# Supplementary material
Source: ML conference proceedings conference paper supplement (https://openreview.net/forum?id=UmCsy3C4xj)
Supplement: supplementary_material [file attachment]

Instance: alarm (37 nodes)

Baseline

Heuristic

Mean Reasoning Time (in s)

$10^0$

0

-54600

-54400

-54200

-54000

-53800

Score

-54600

-54400

-54200

-54000

-53800

Score

✕ k-greedy  
● k-MAX

tw or  $\log_2(\text{mss})$

20

15

10

5
