# Supplementary material
Source: ML conference proceedings conference paper supplement (https://openreview.net/forum?id=UmCsy3C4xj)
Supplement: supplementary_material [file attachment]

Baseline

Instance: insurance (27 nodes)

Heuristic

Mean Reasoning Time (in s)

 $10^0$ 

0

-70500

-70000

-69500

-69000

-68500

-68000

Score

-70500

-70000

-69500

-69000

-68500

-68000

Score

✕ k-greedy  
● k-MAXtw or  $\log_2(\text{msss})$ 

20

15

10

5
