# Supplementary material
Source: ML conference proceedings conference paper supplement (https://openreview.net/forum?id=UmCsy3C4xj)

Instance: survey (6 nodes)

Baseline

Heuristic

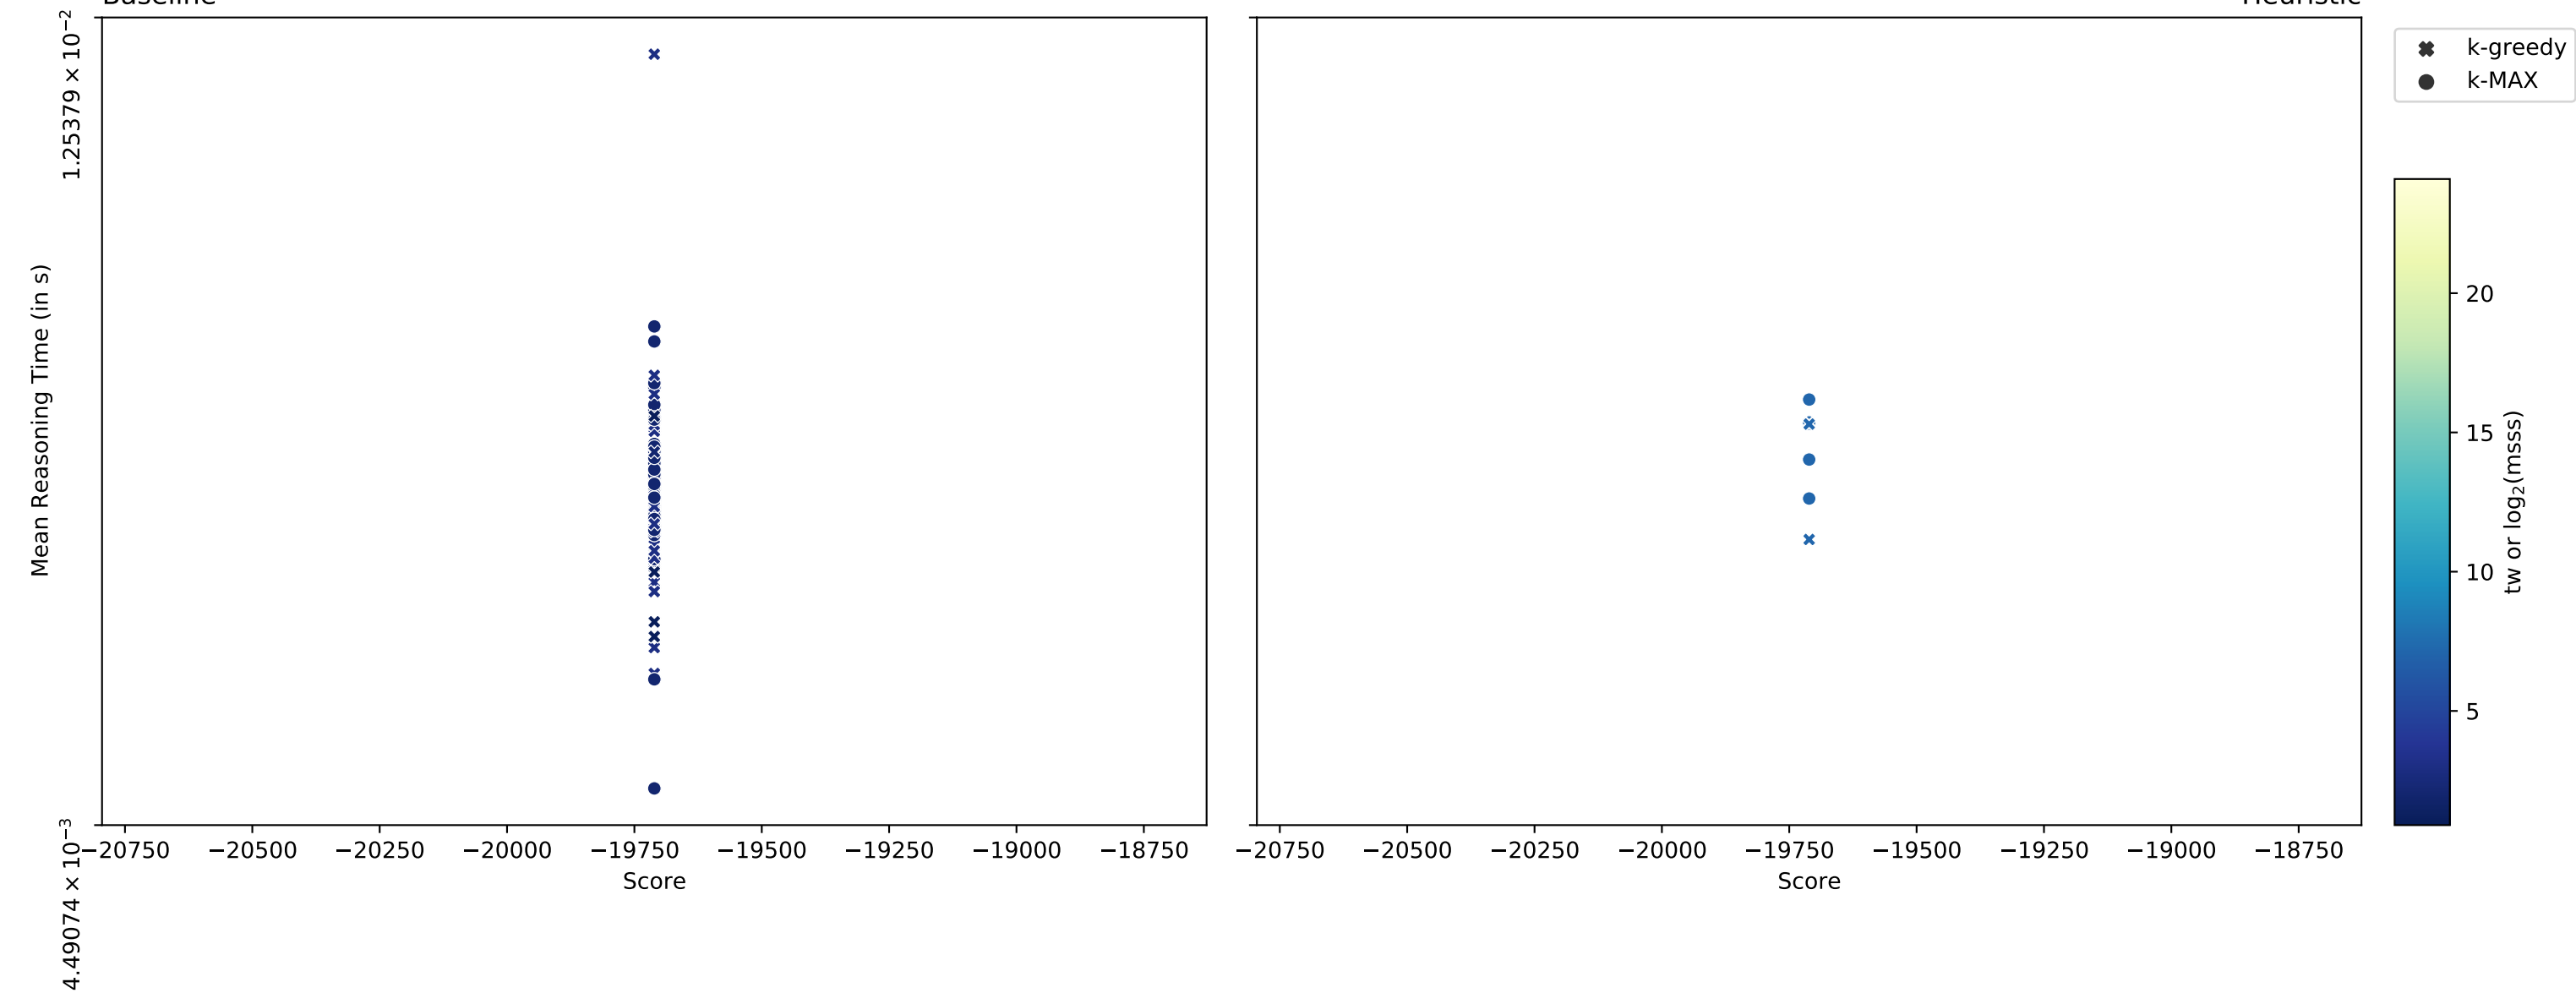

Supplement: supplementary_material [file attachment]

Instance: pigs (441 nodes)

Baseline

Heuristic

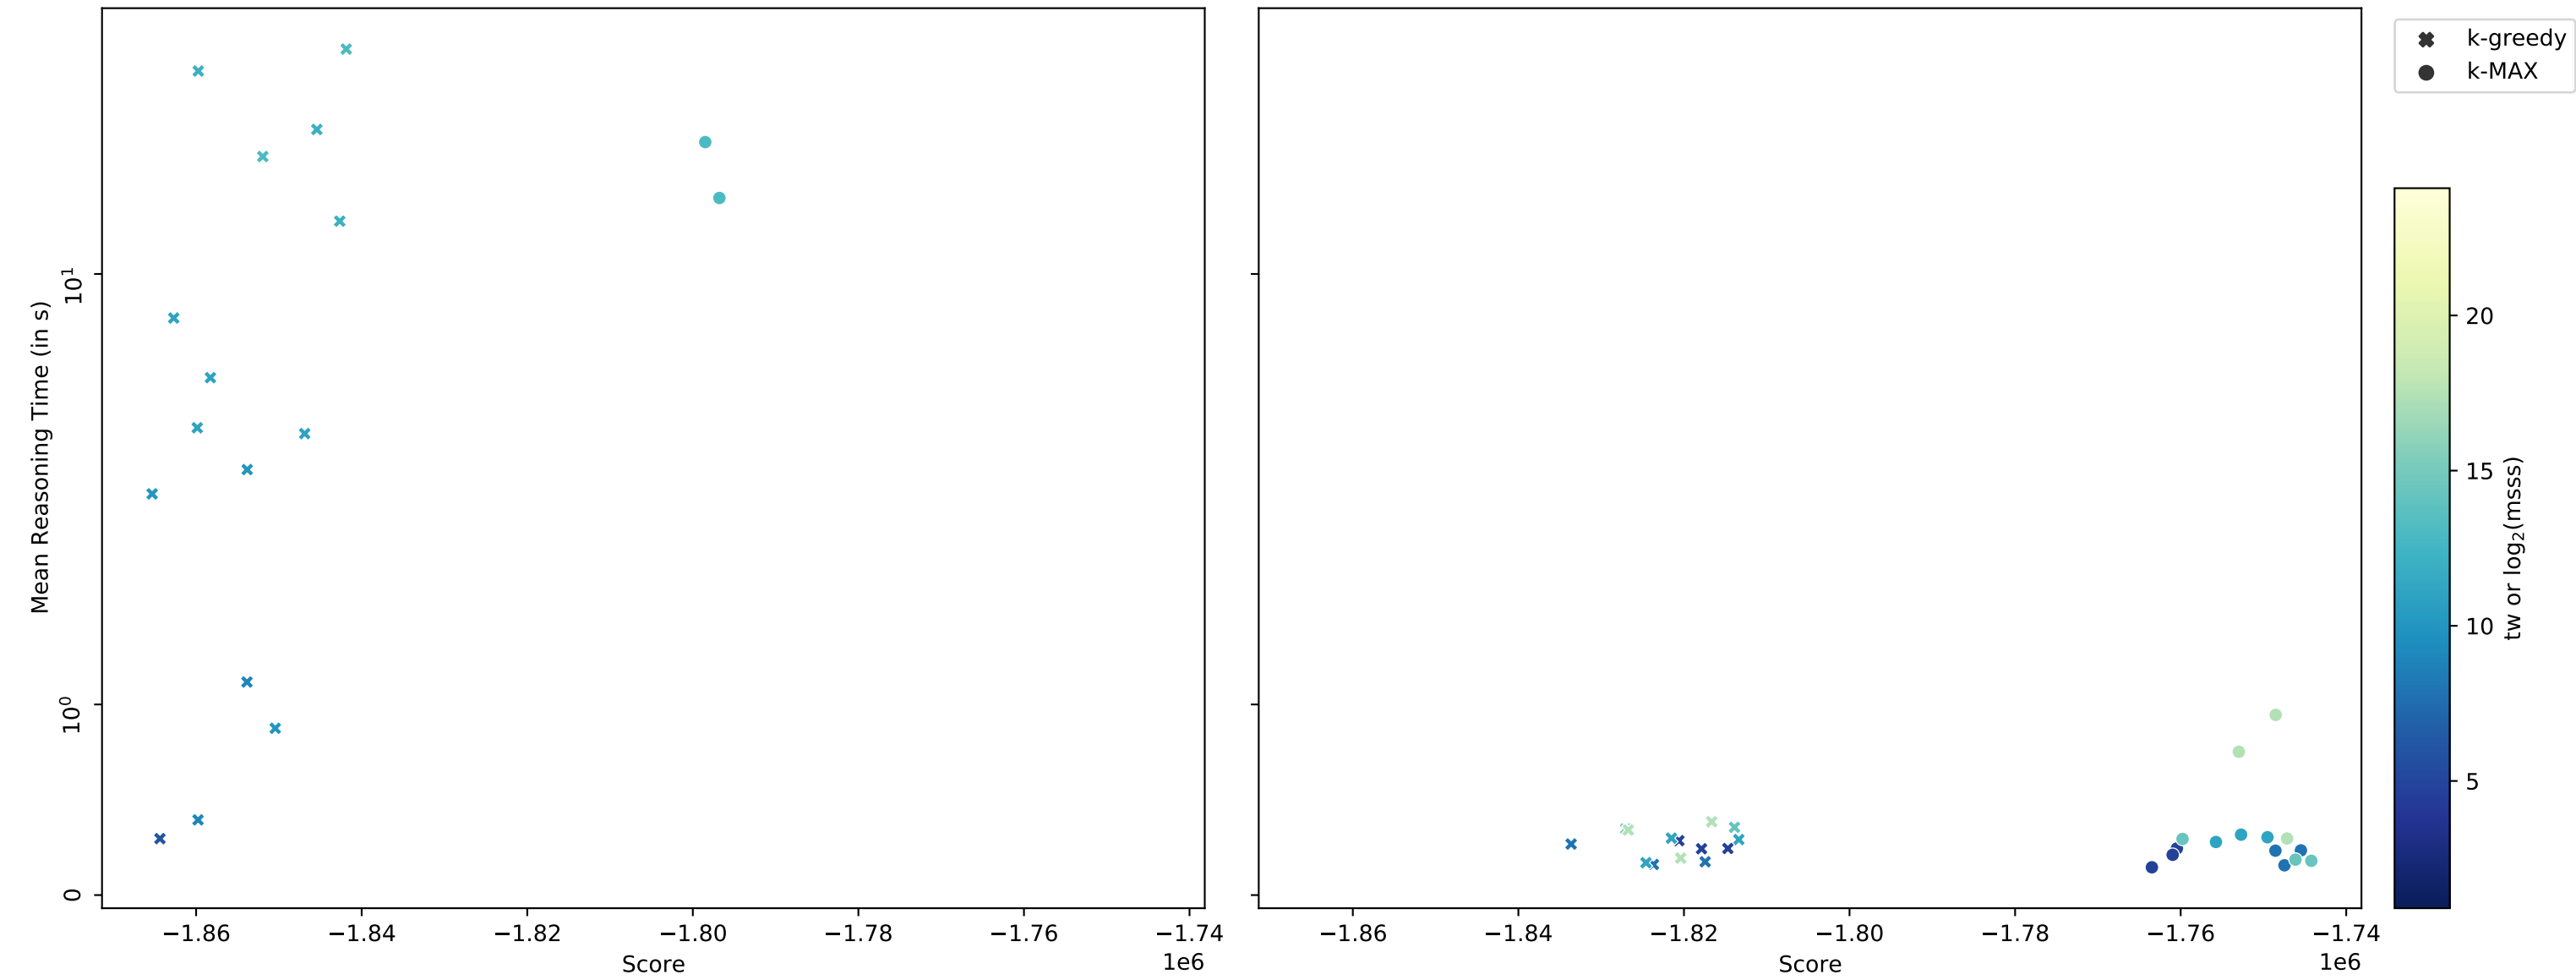

Supplement: supplementary_material [file attachment]

Instance: barley (48 nodes)

Baseline

Heuristic

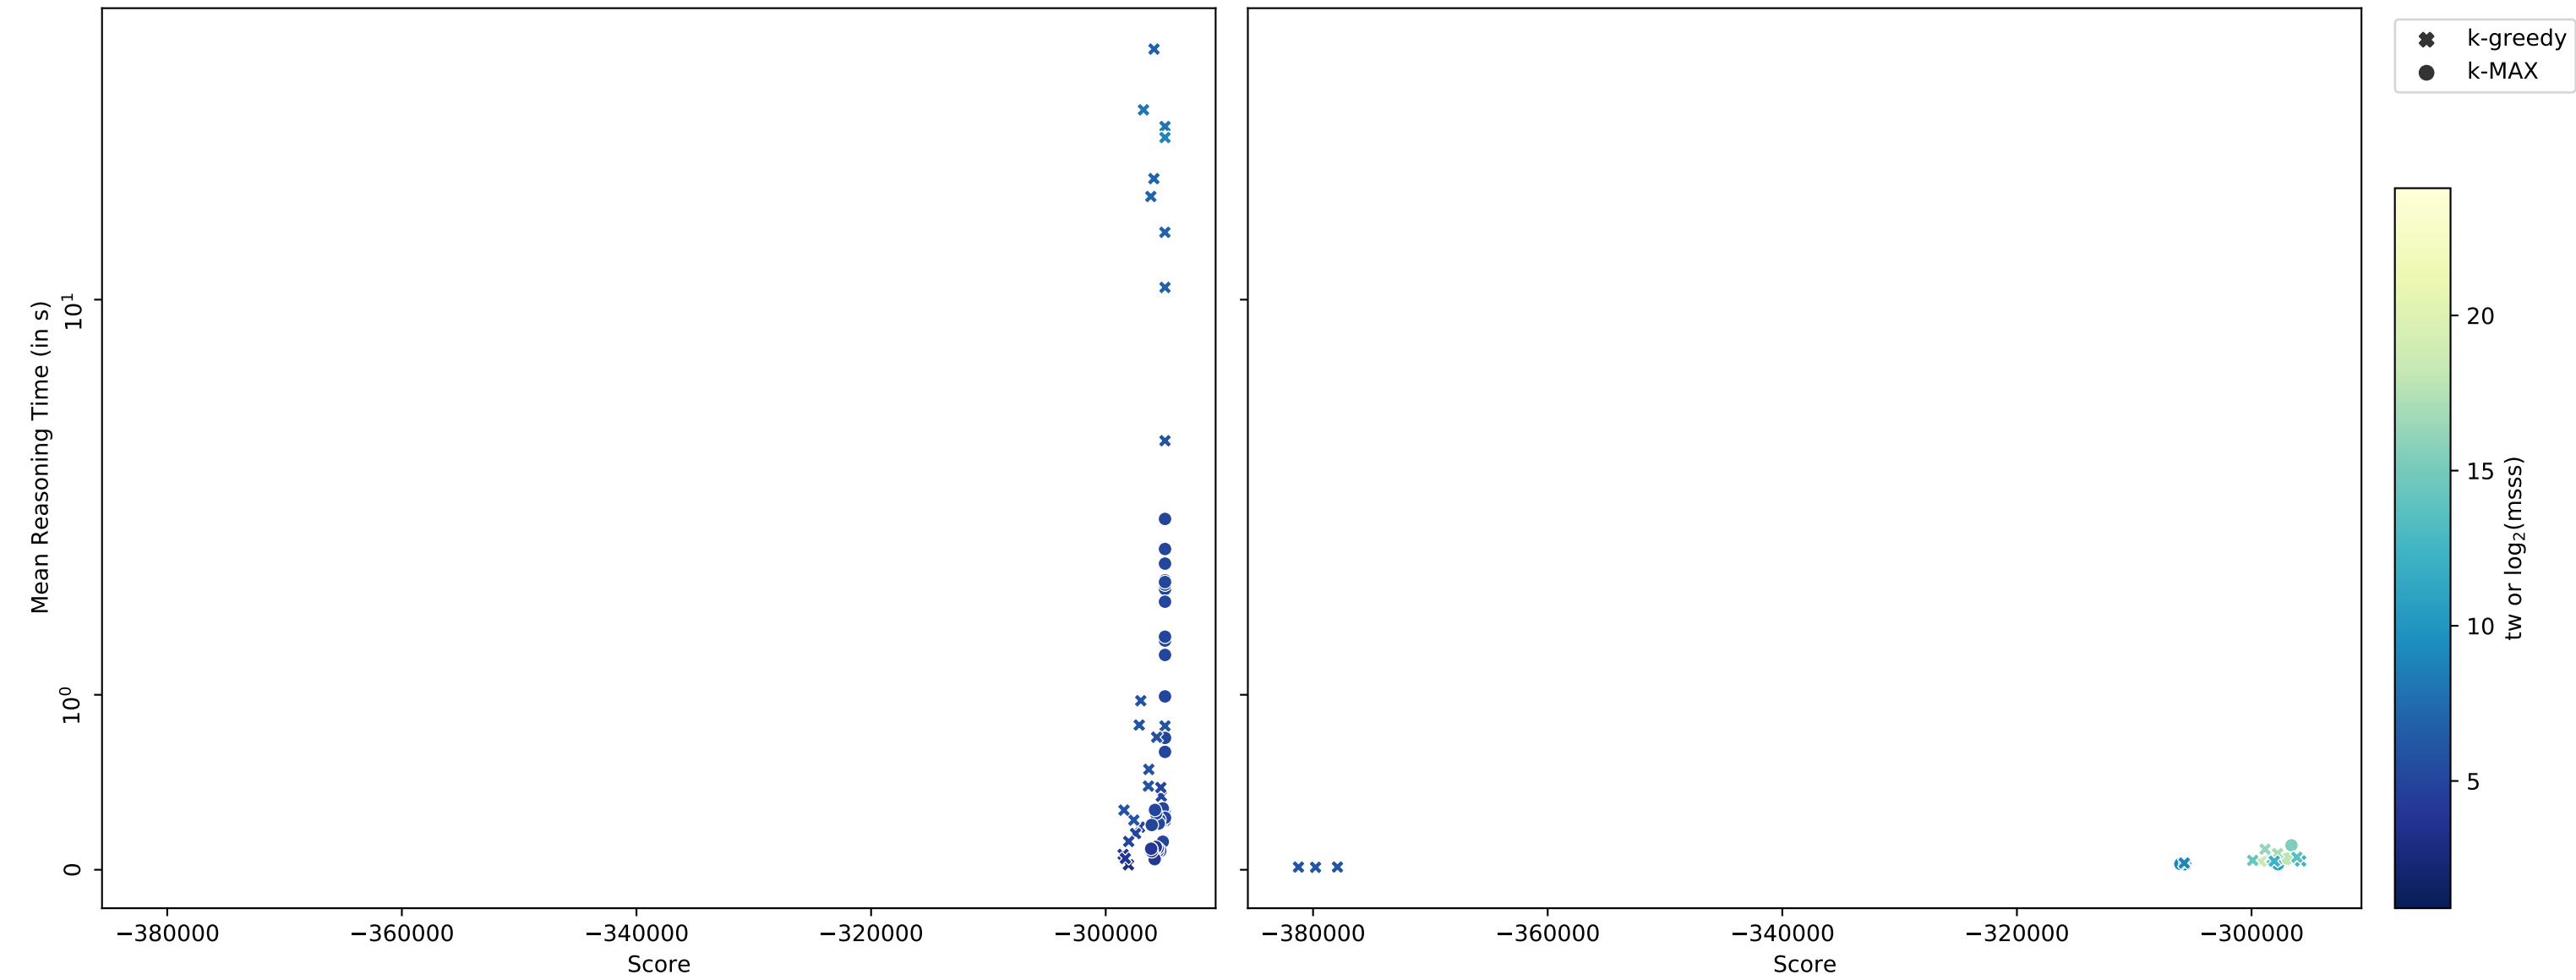

Supplement: supplementary_material [file attachment]

Instance: hailfinder (56 nodes)

Baseline

Heuristic

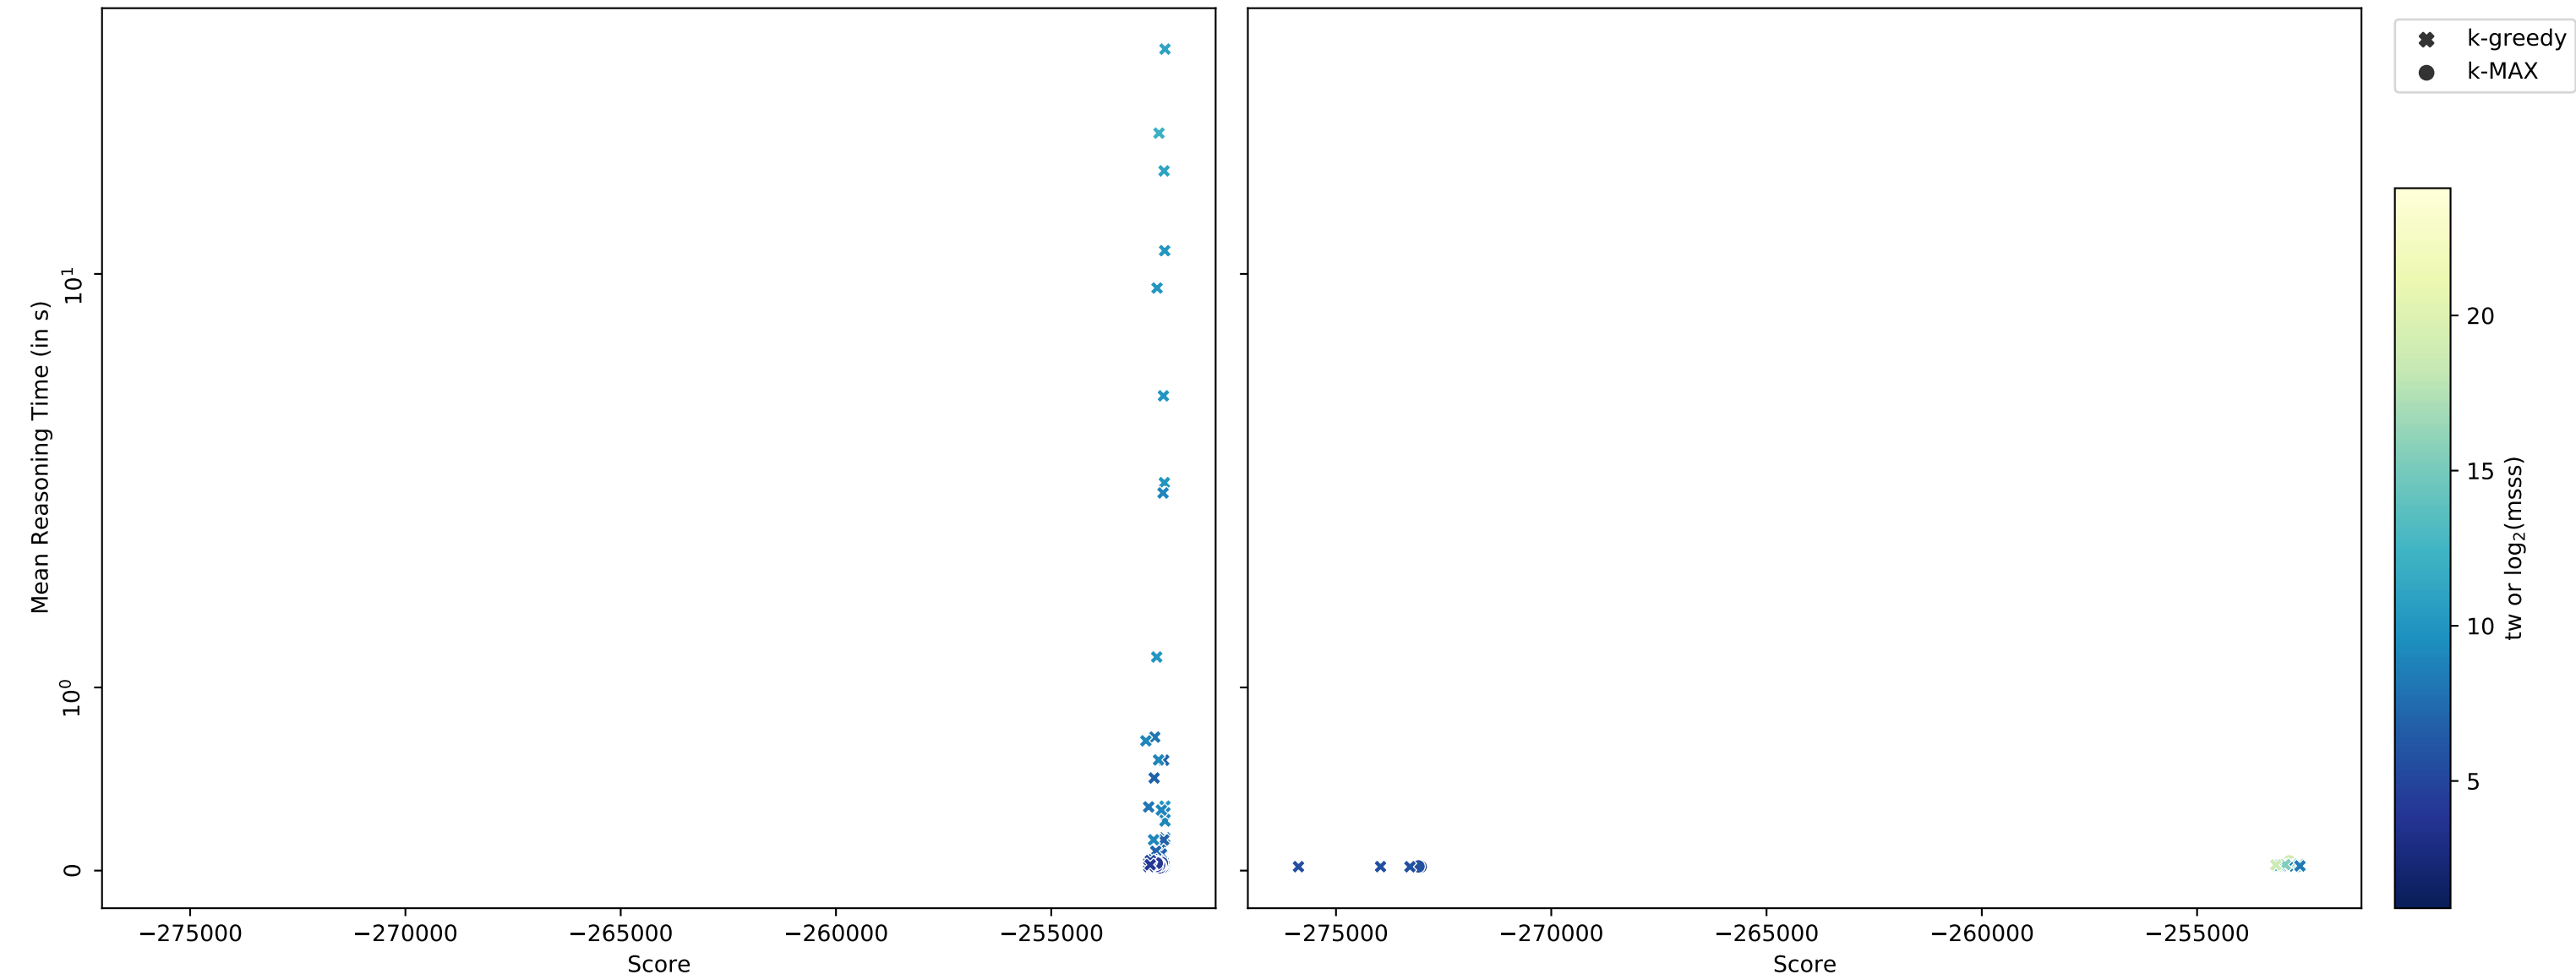

Supplement: supplementary_material [file attachment]

Instance: water (32 nodes)

Baseline

Heuristic

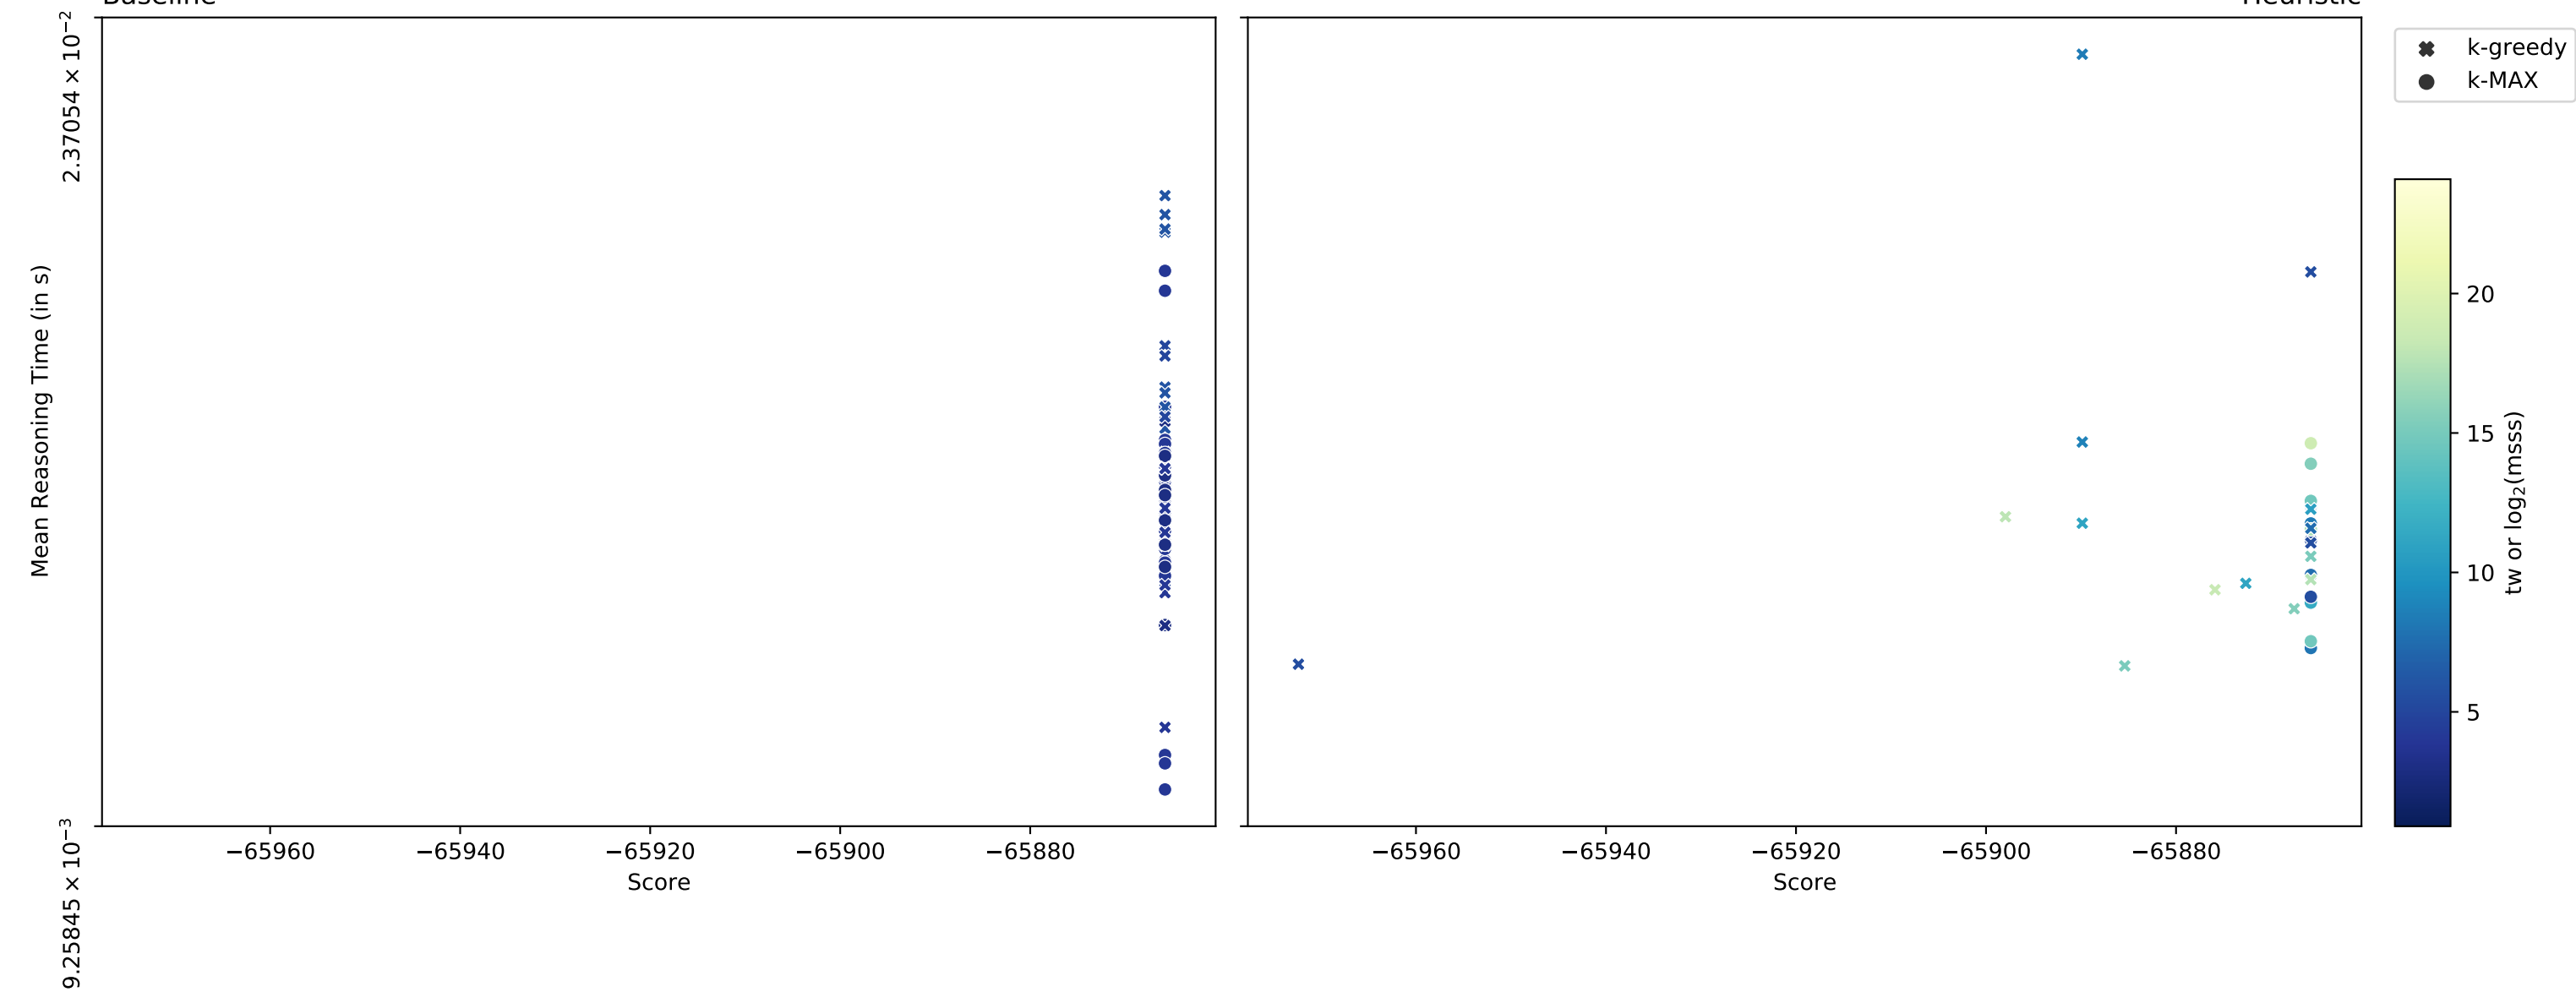

Supplement: supplementary_material [file attachment]

Instance: munin (1041 nodes)

Baseline

Heuristic

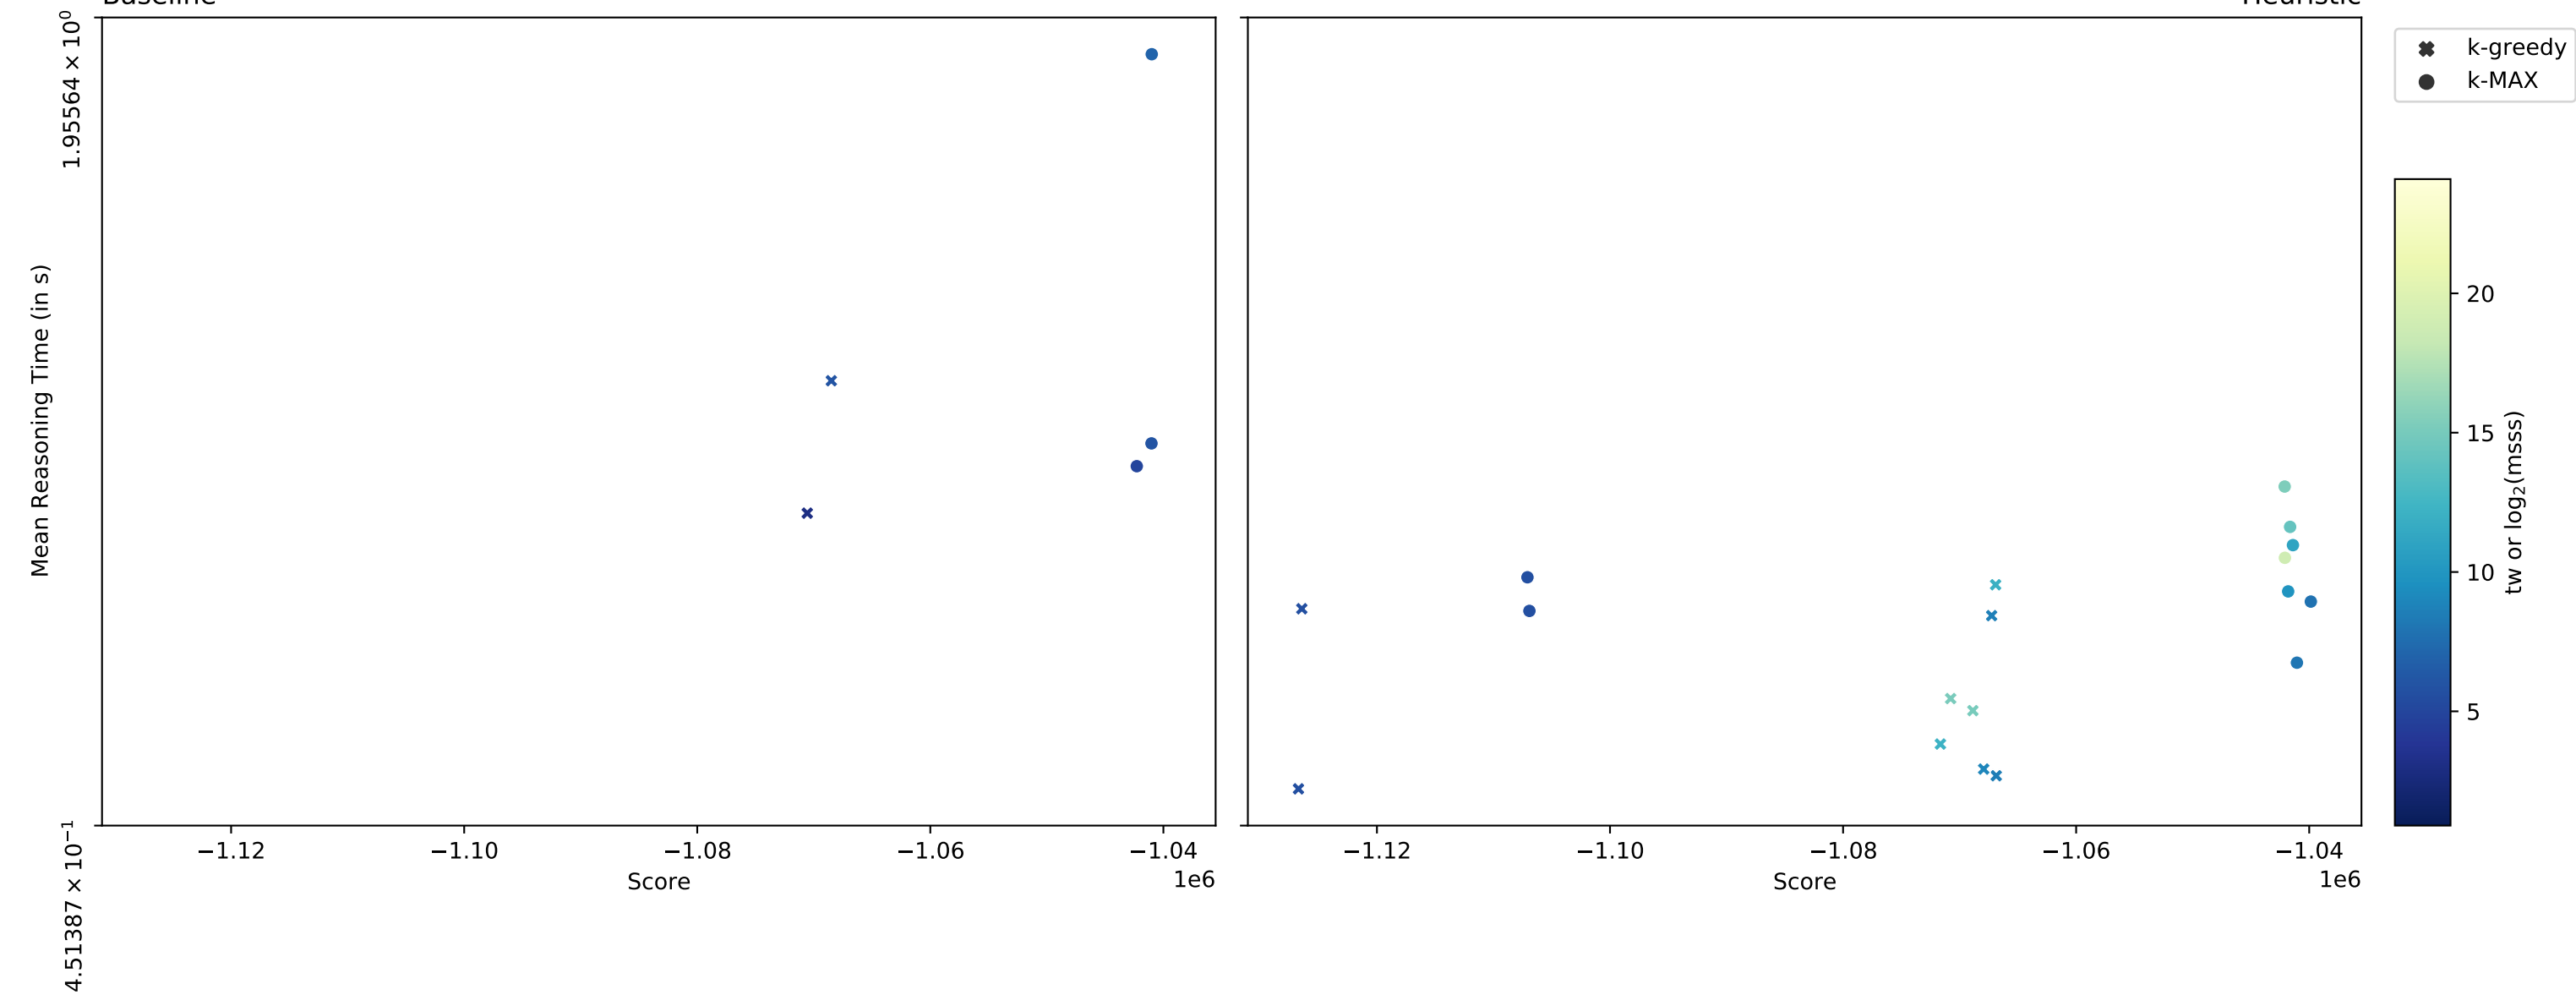

Supplement: supplementary_material [file attachment]

Instance: munin1 (186 nodes)

Baseline

Heuristic

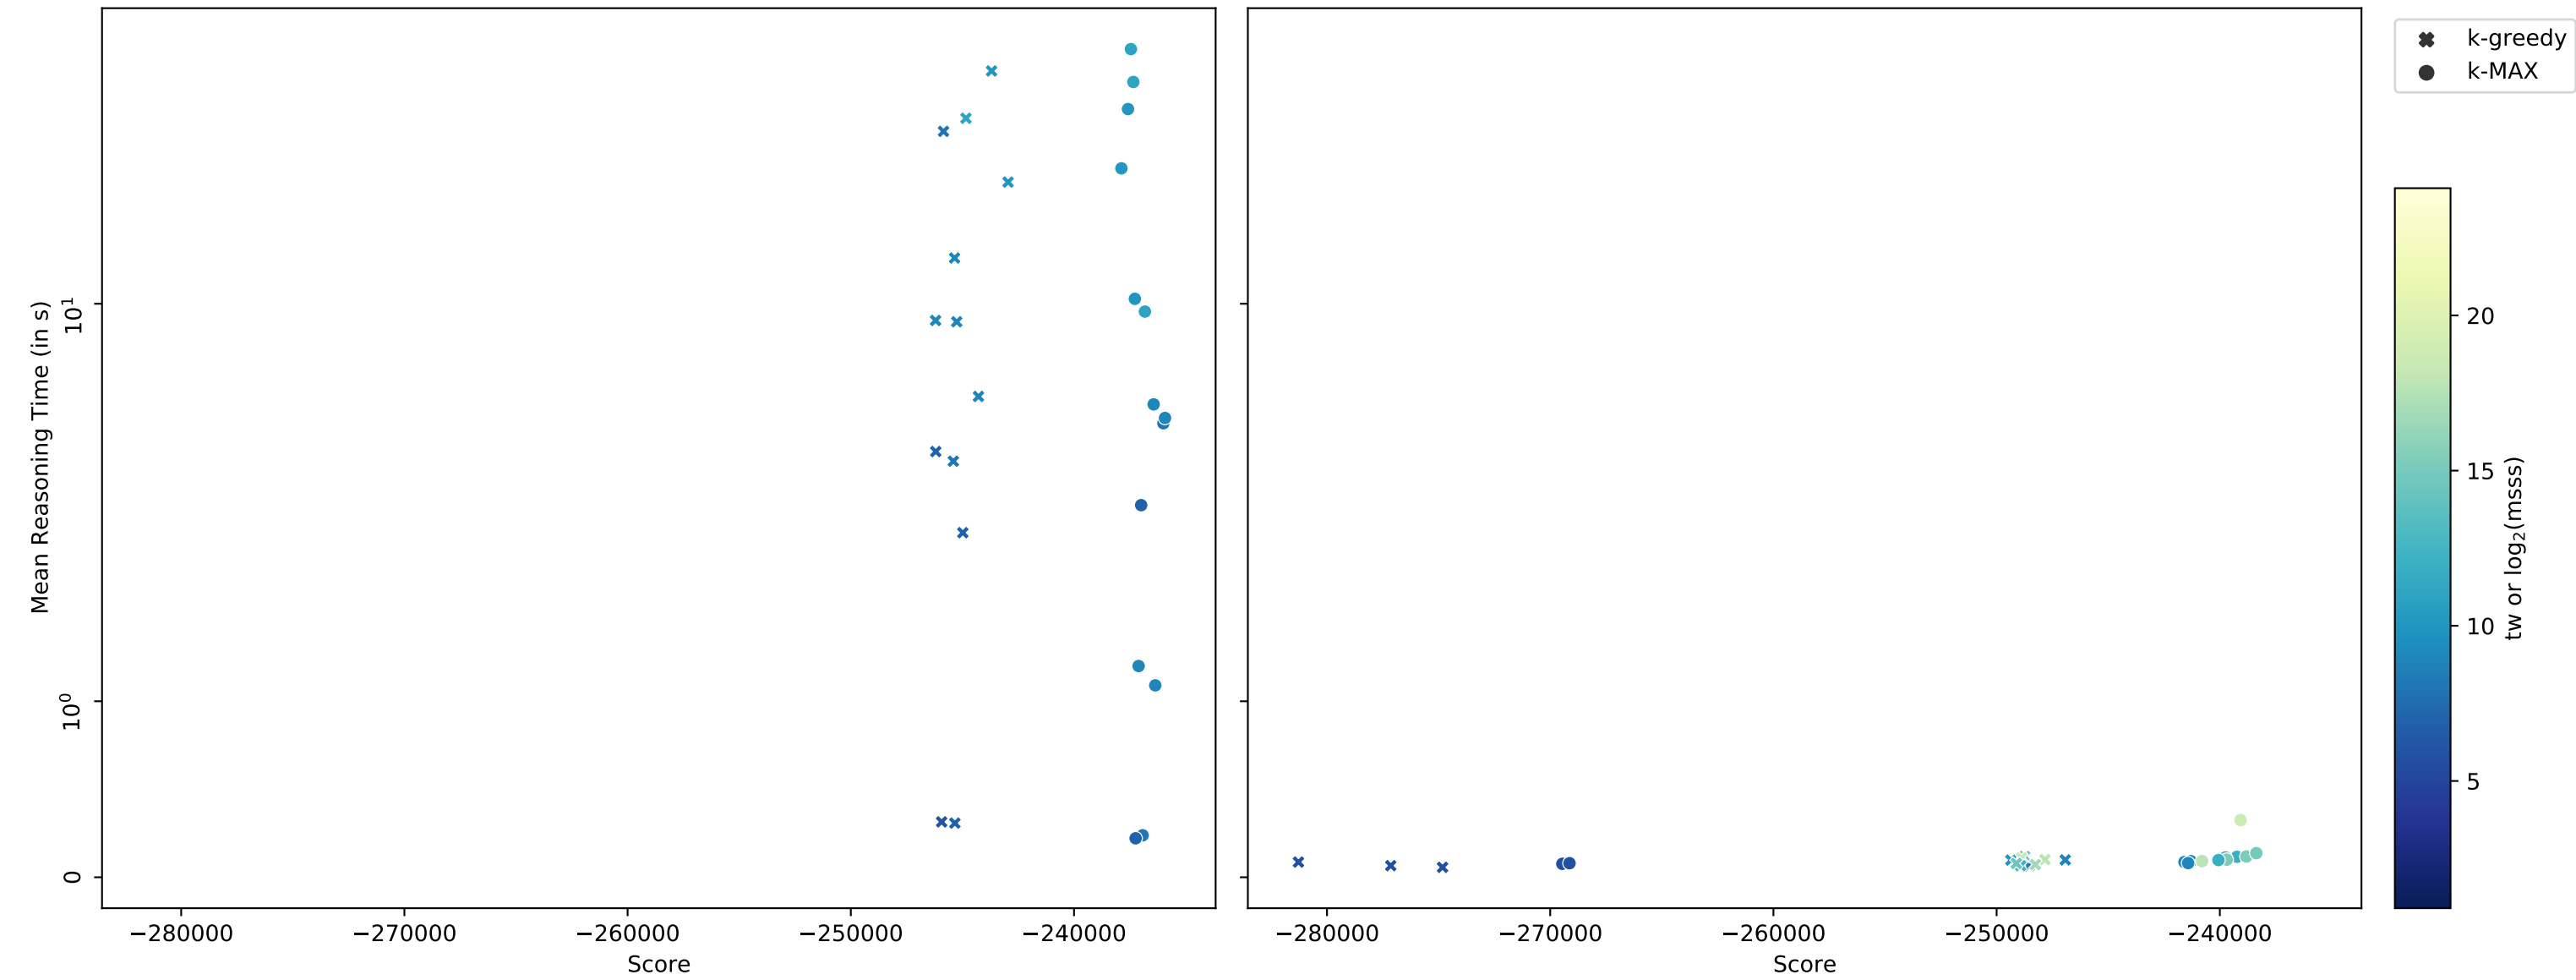

Supplement: supplementary_material [file attachment]

Instance: link (724 nodes)

Baseline

Heuristic

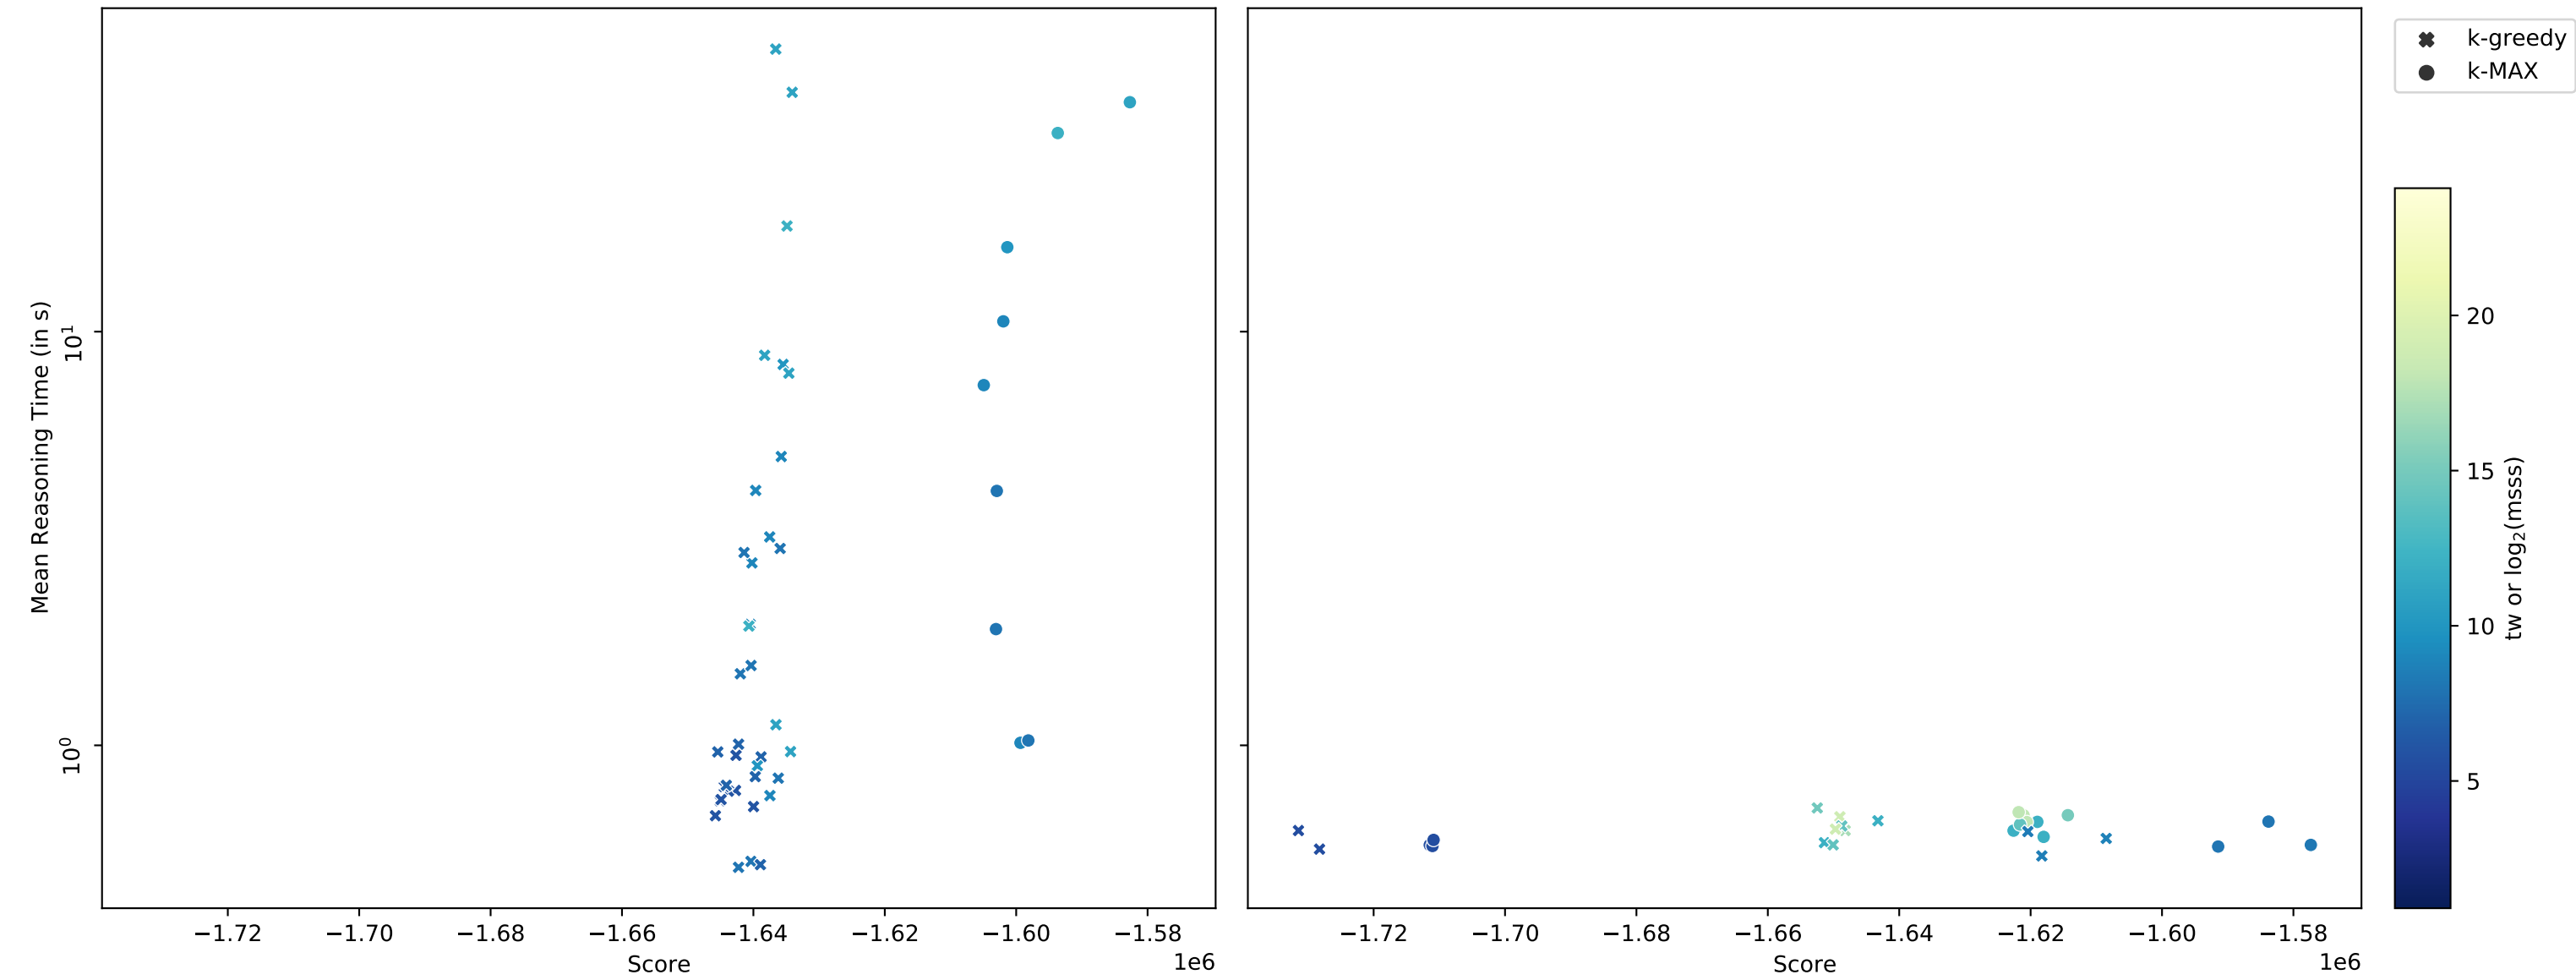

Supplement: supplementary_material [file attachment]

Instance: sachs (11 nodes)

Baseline

Heuristic

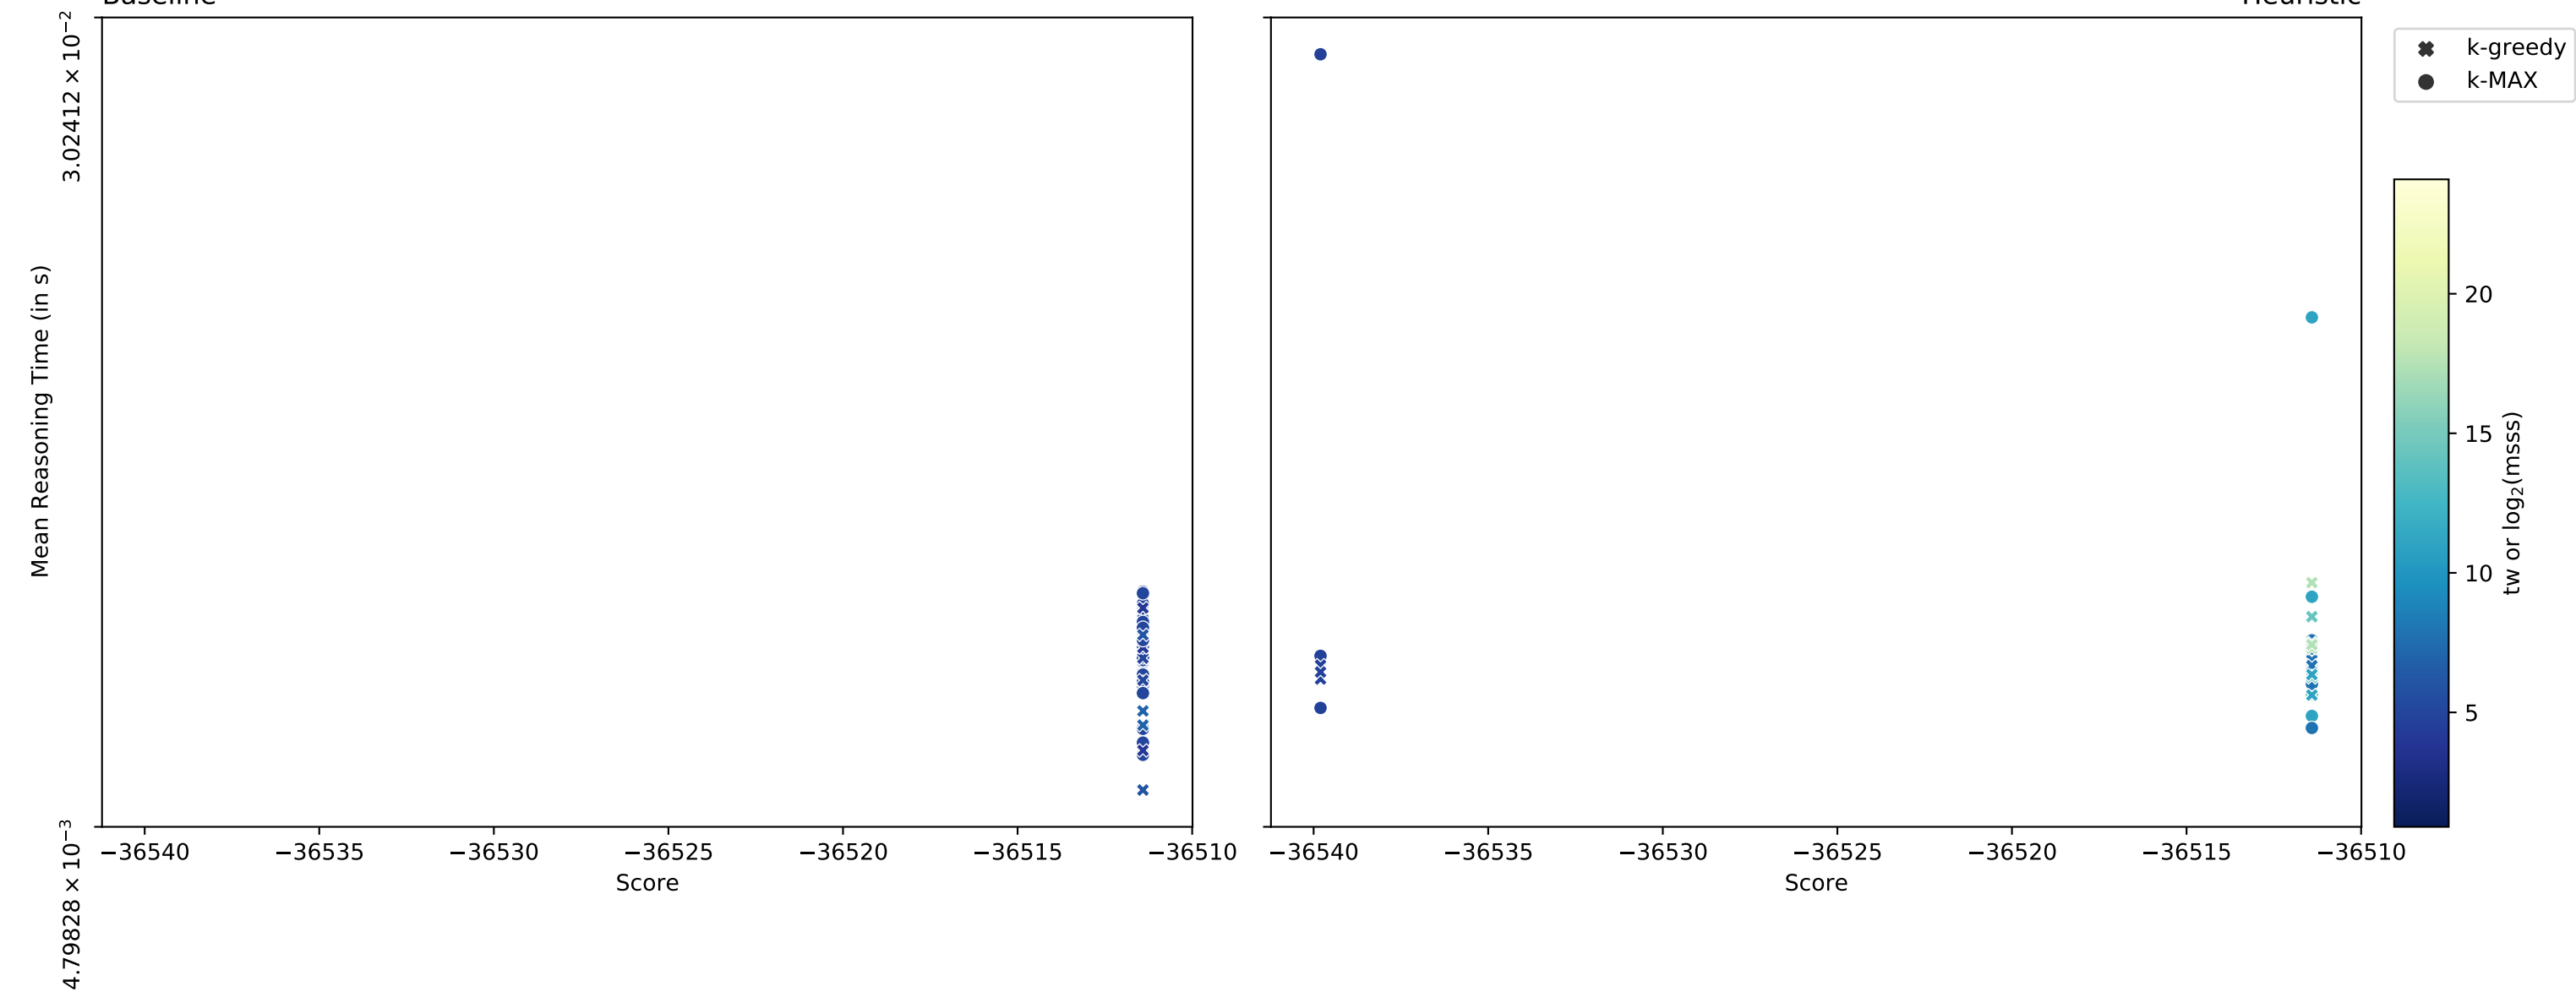

Supplement: supplementary_material [file attachment]

Instance: hepar2 (70 nodes)

Baseline

Heuristic

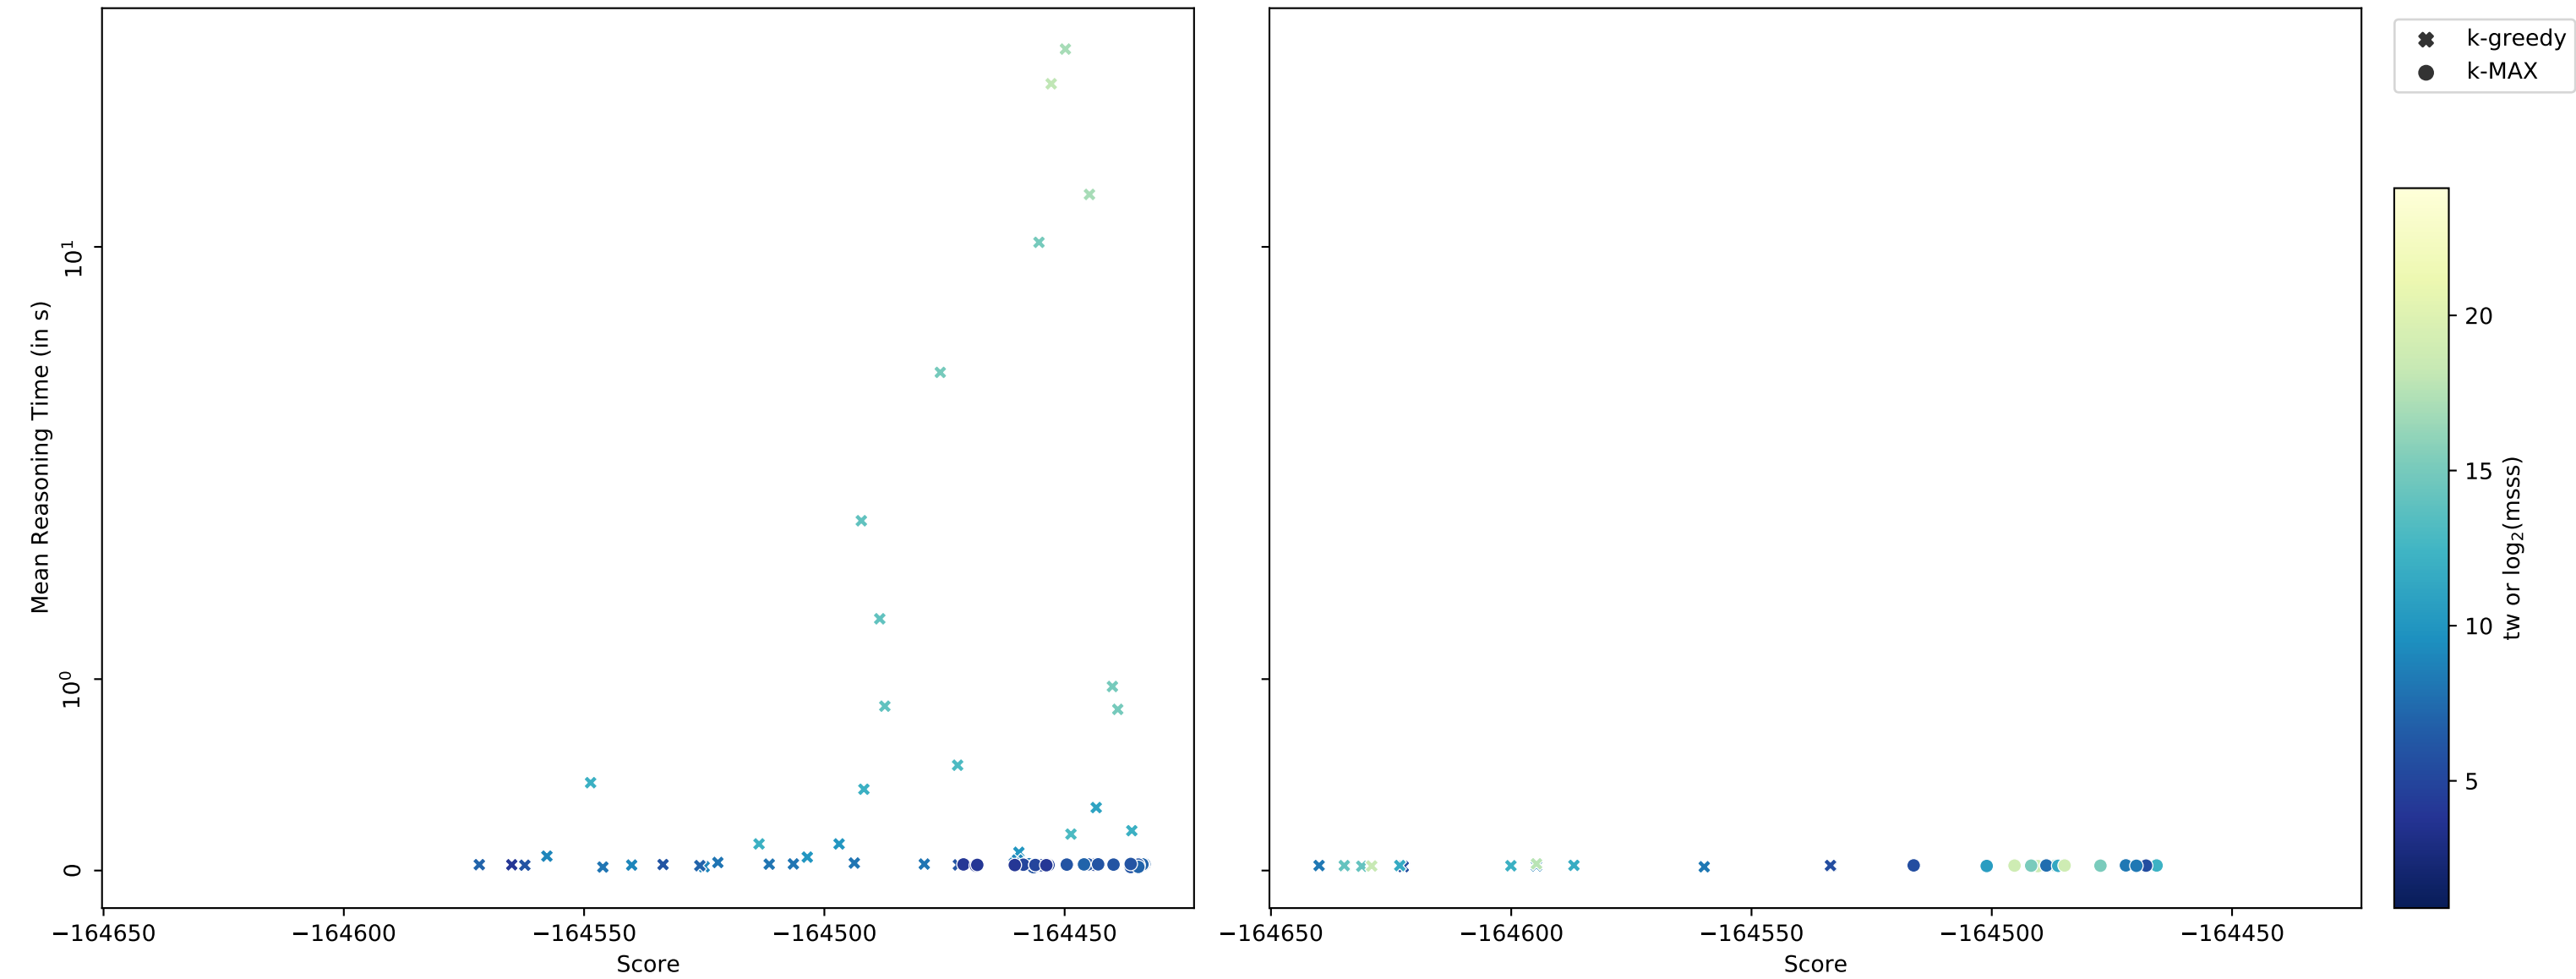

Supplement: supplementary_material [file attachment]

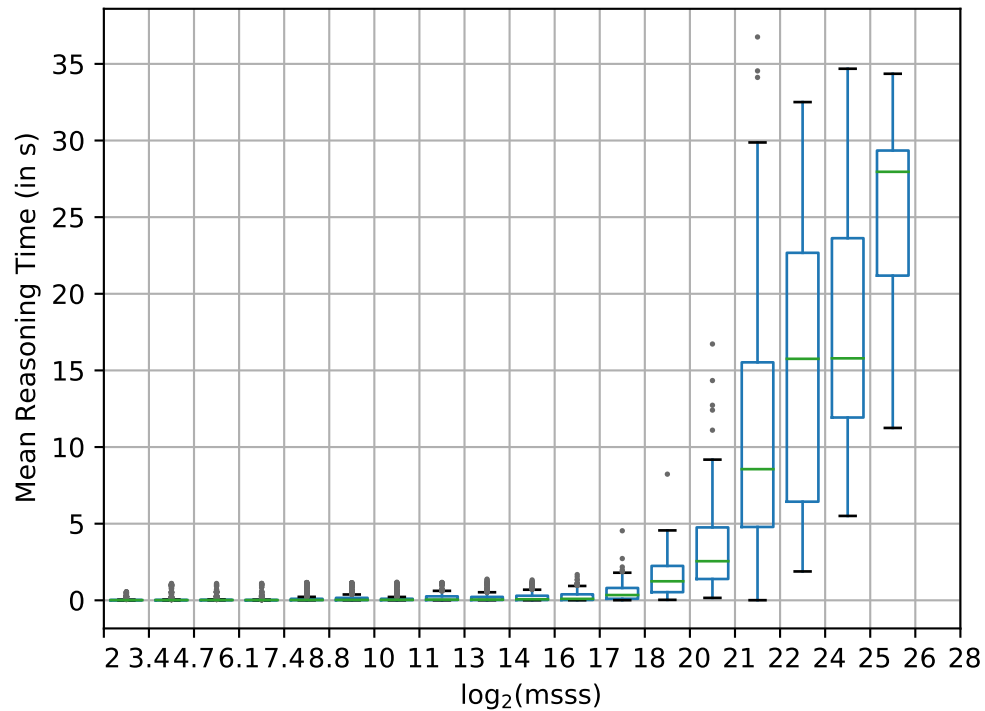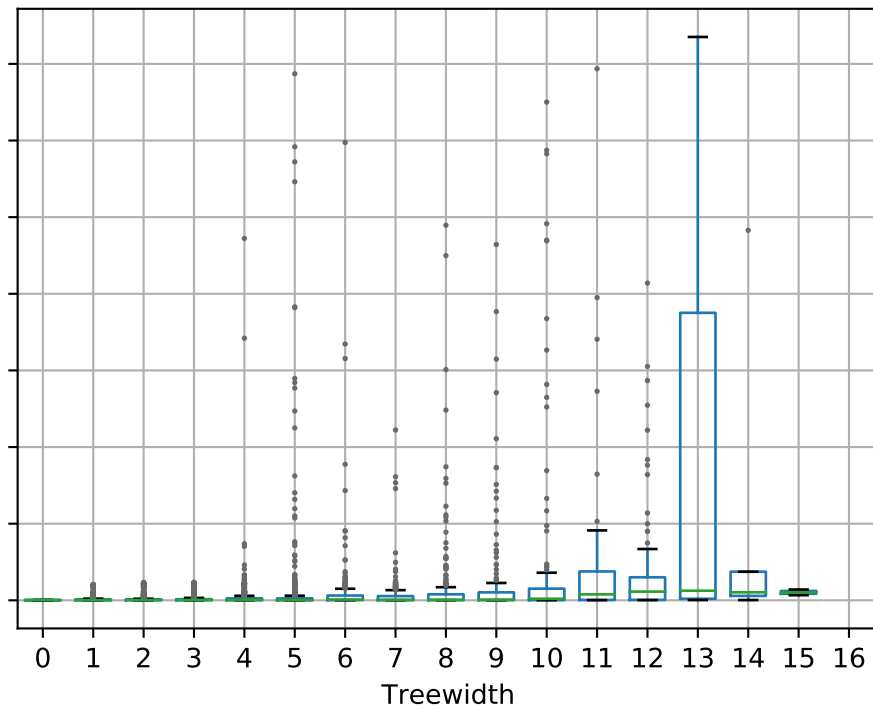

Supplement: supplementary_material [file attachment]

Instance: pathfinder (109 nodes)

Baseline

Heuristic

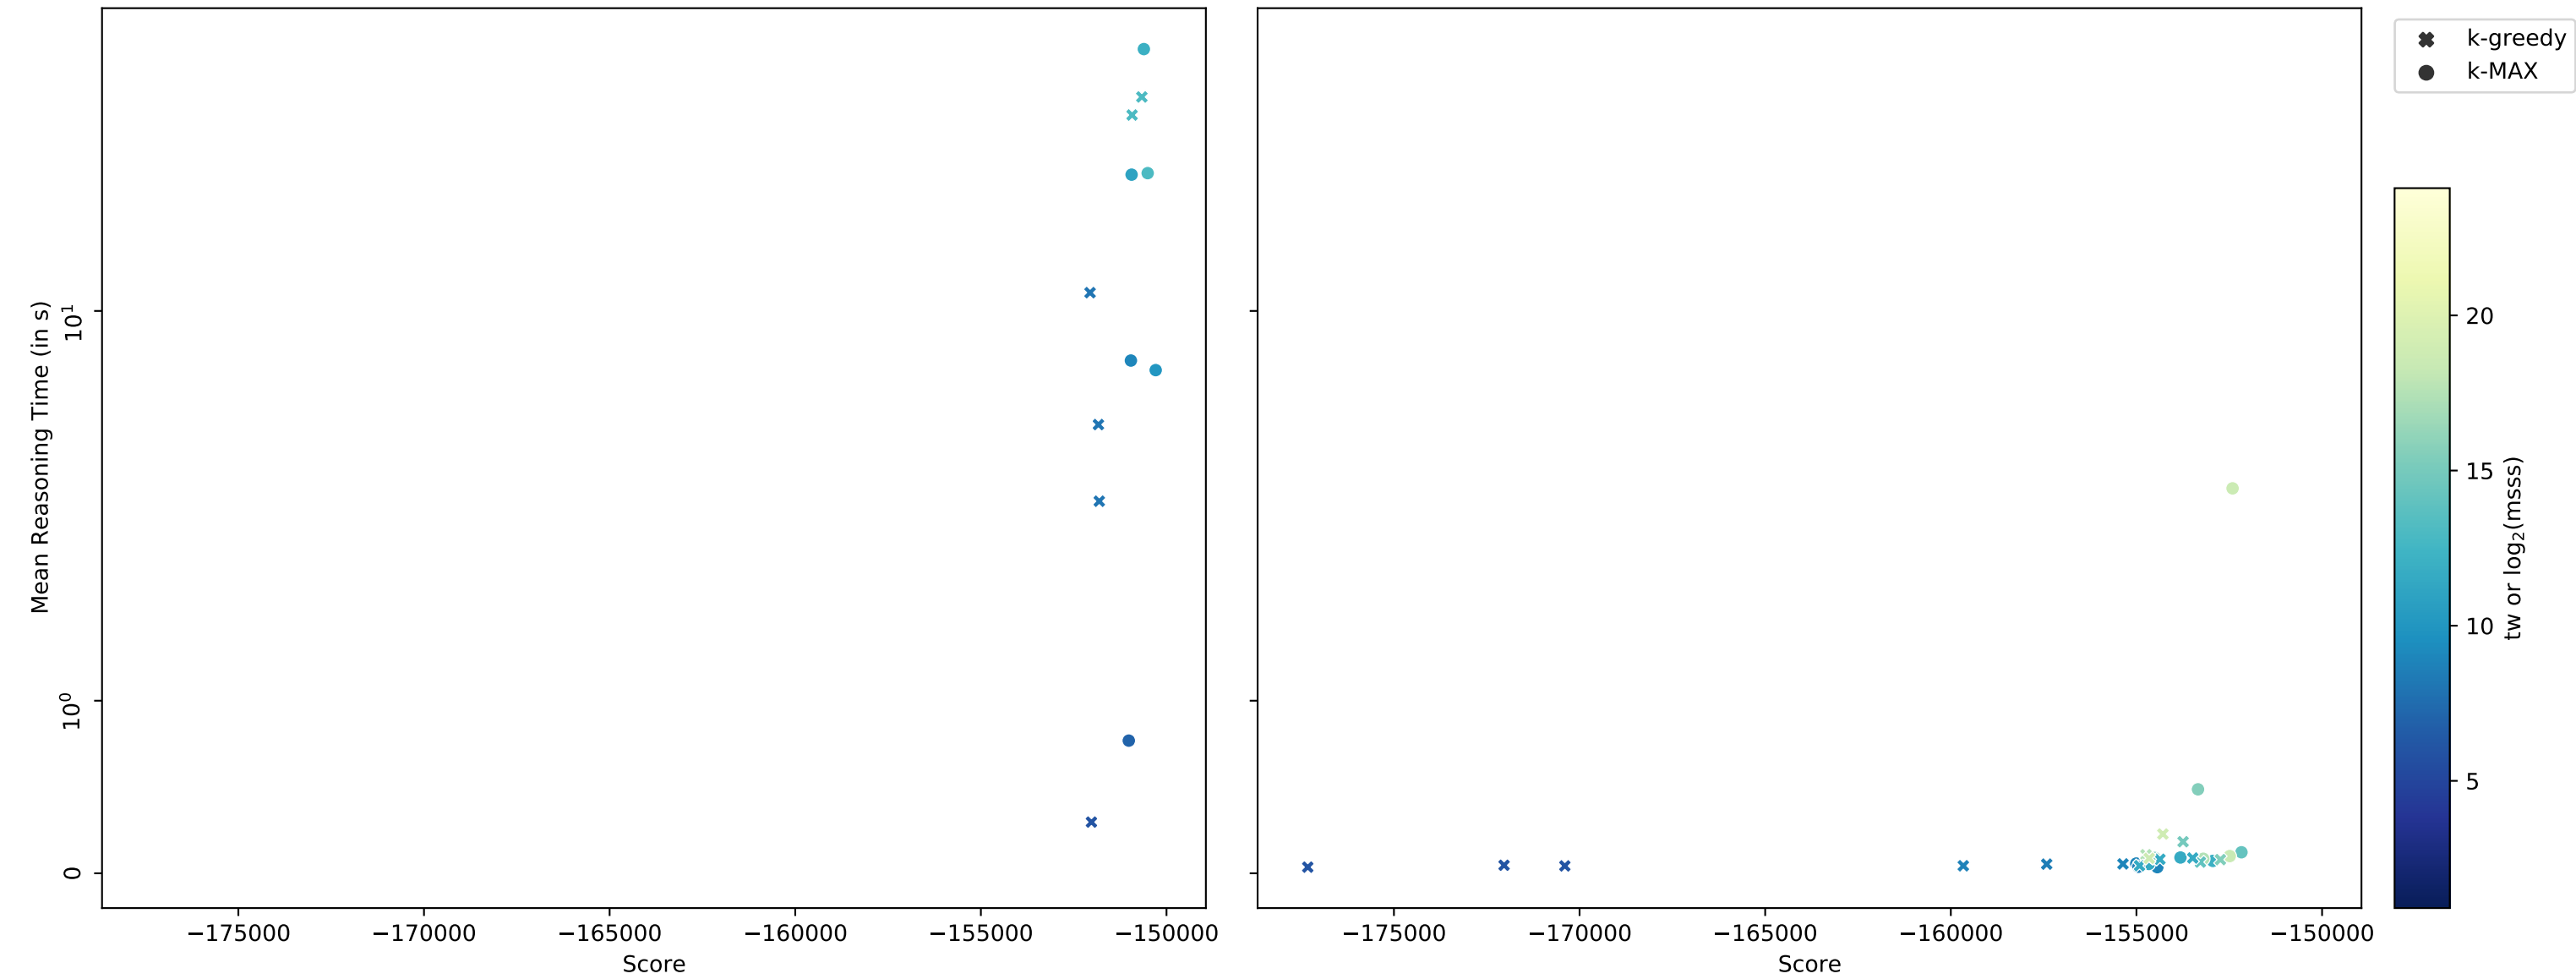

Supplement: supplementary_material [file attachment]

Baseline

Instance: diabetes (413 nodes)

Heuristic

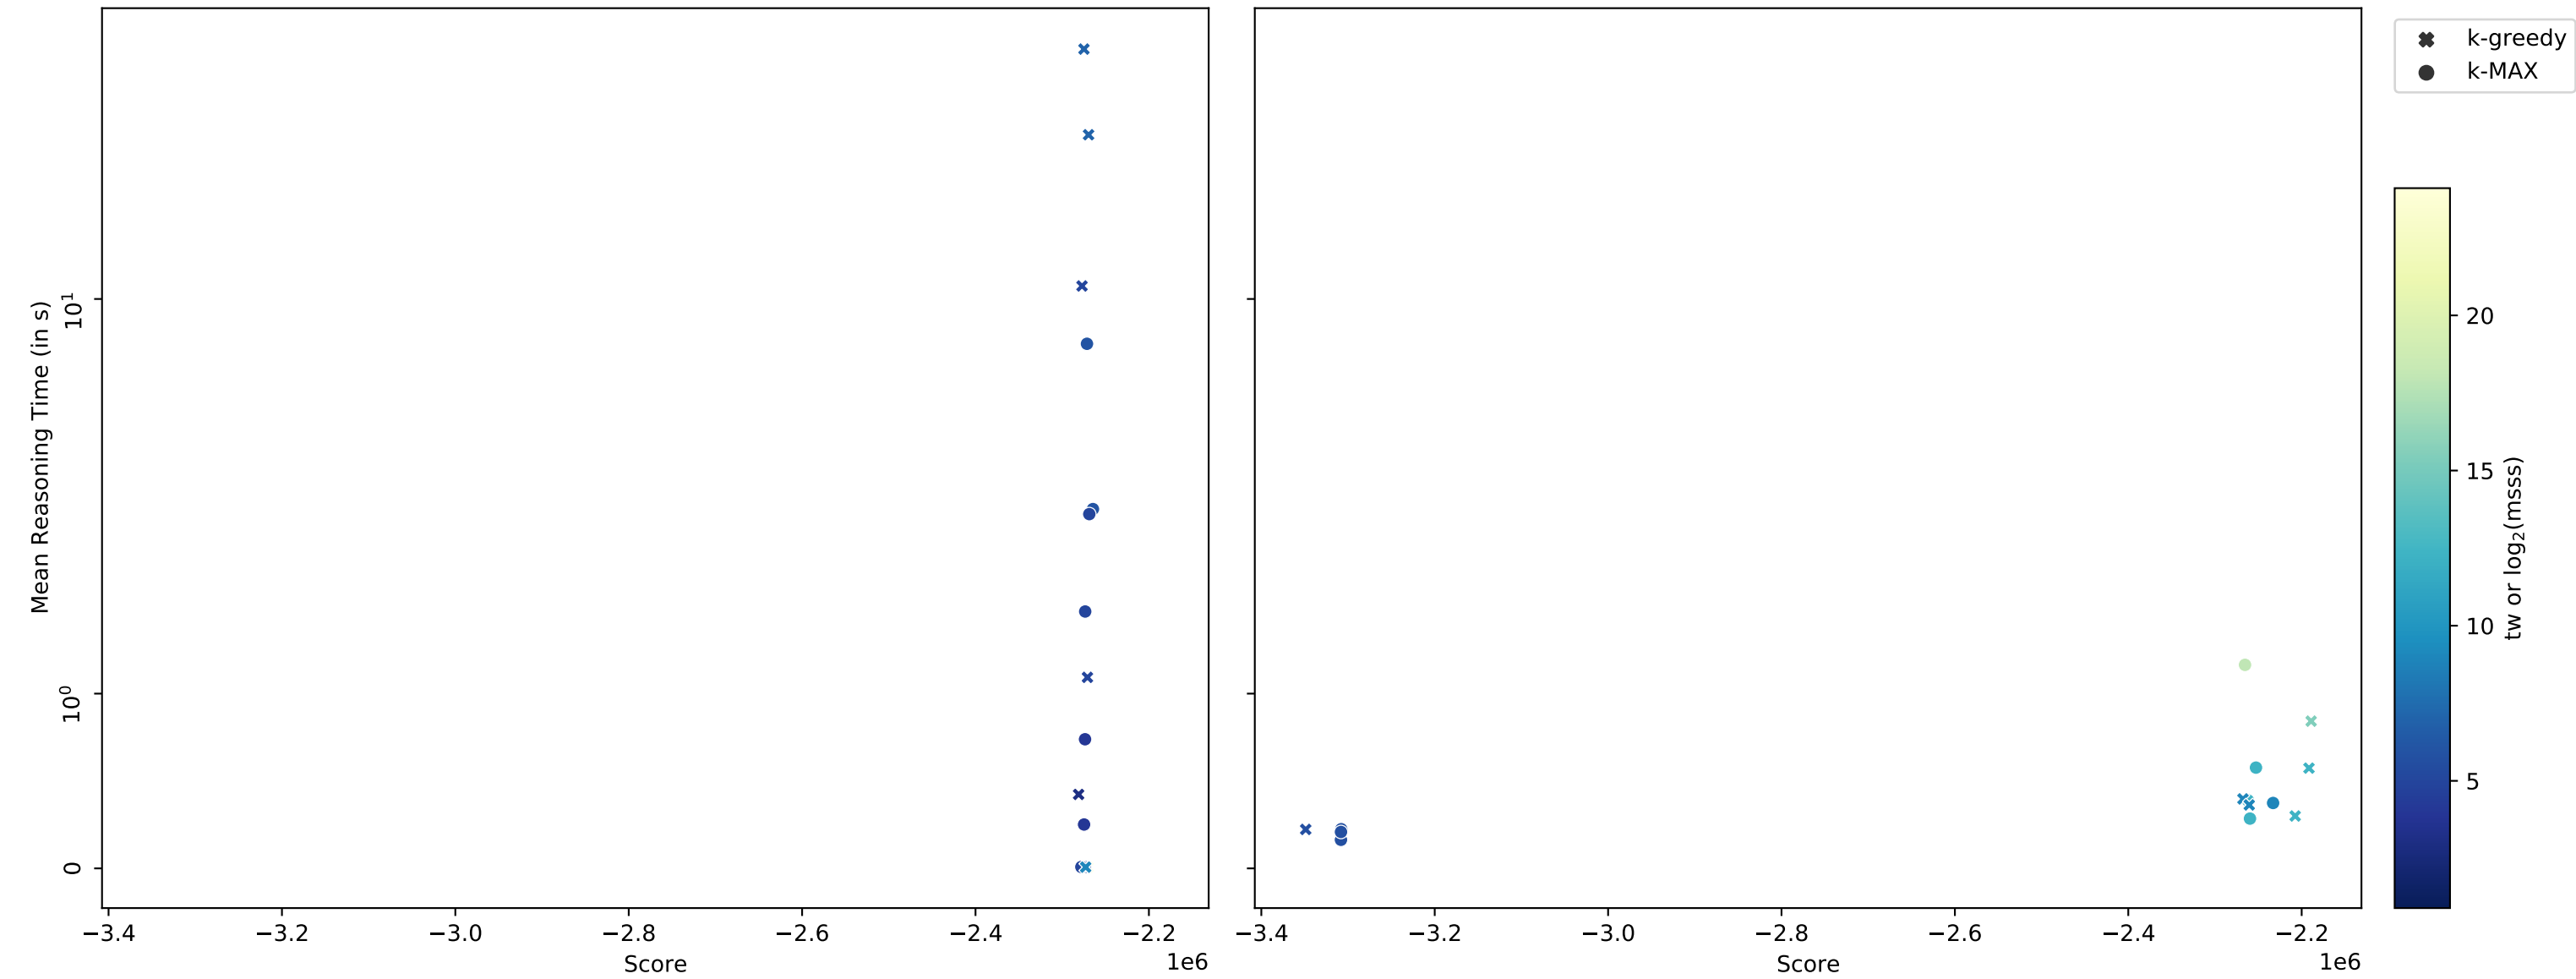

Supplement: supplementary_material [file attachment]

Instance: child (20 nodes)

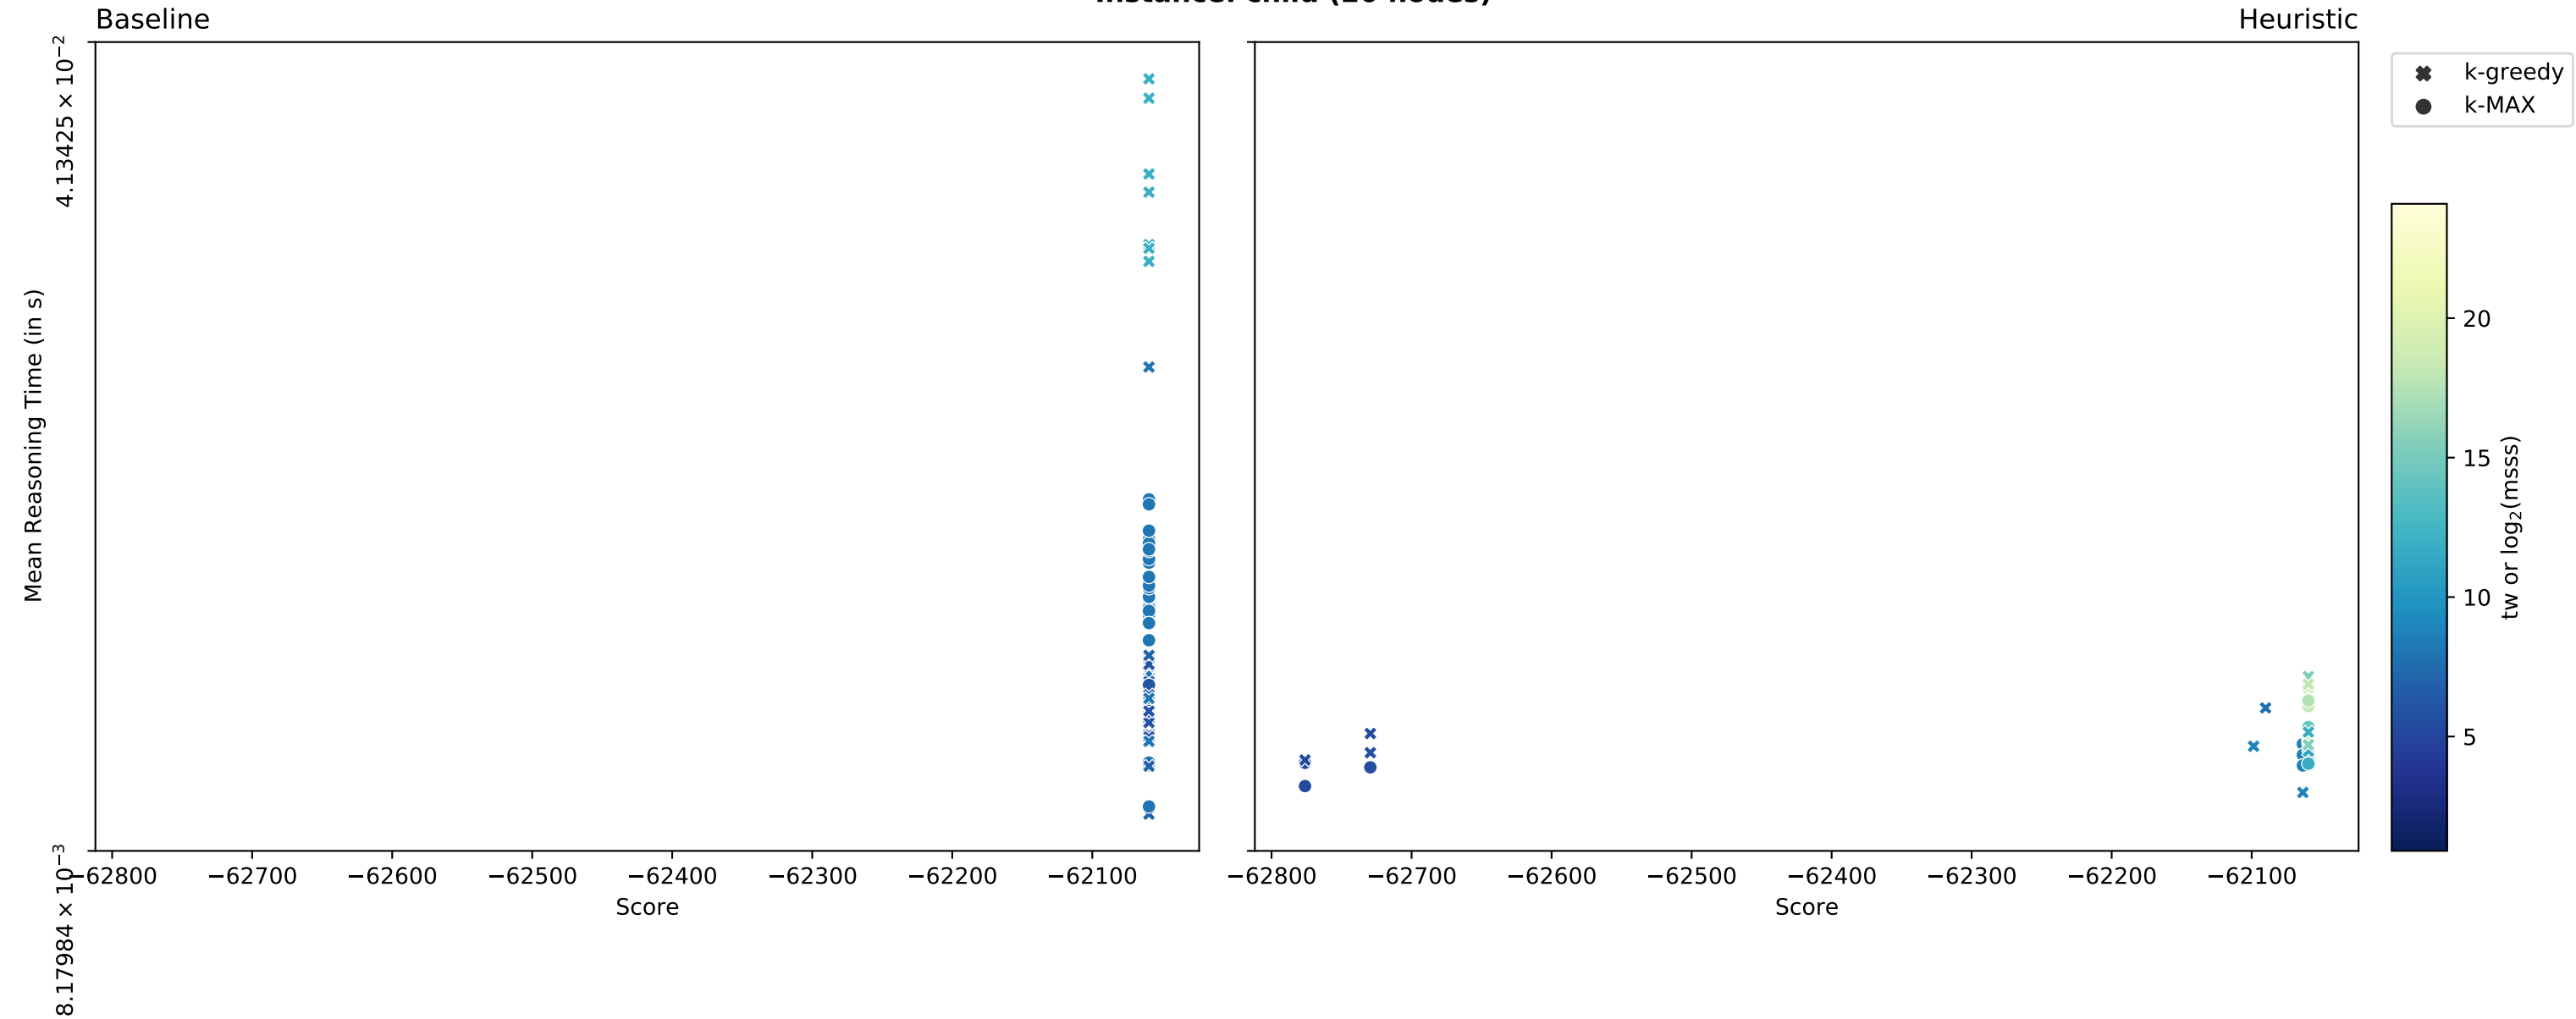

Supplement: supplementary_material [file attachment]

Instance: mildew (35 nodes)

Baseline

Heuristic

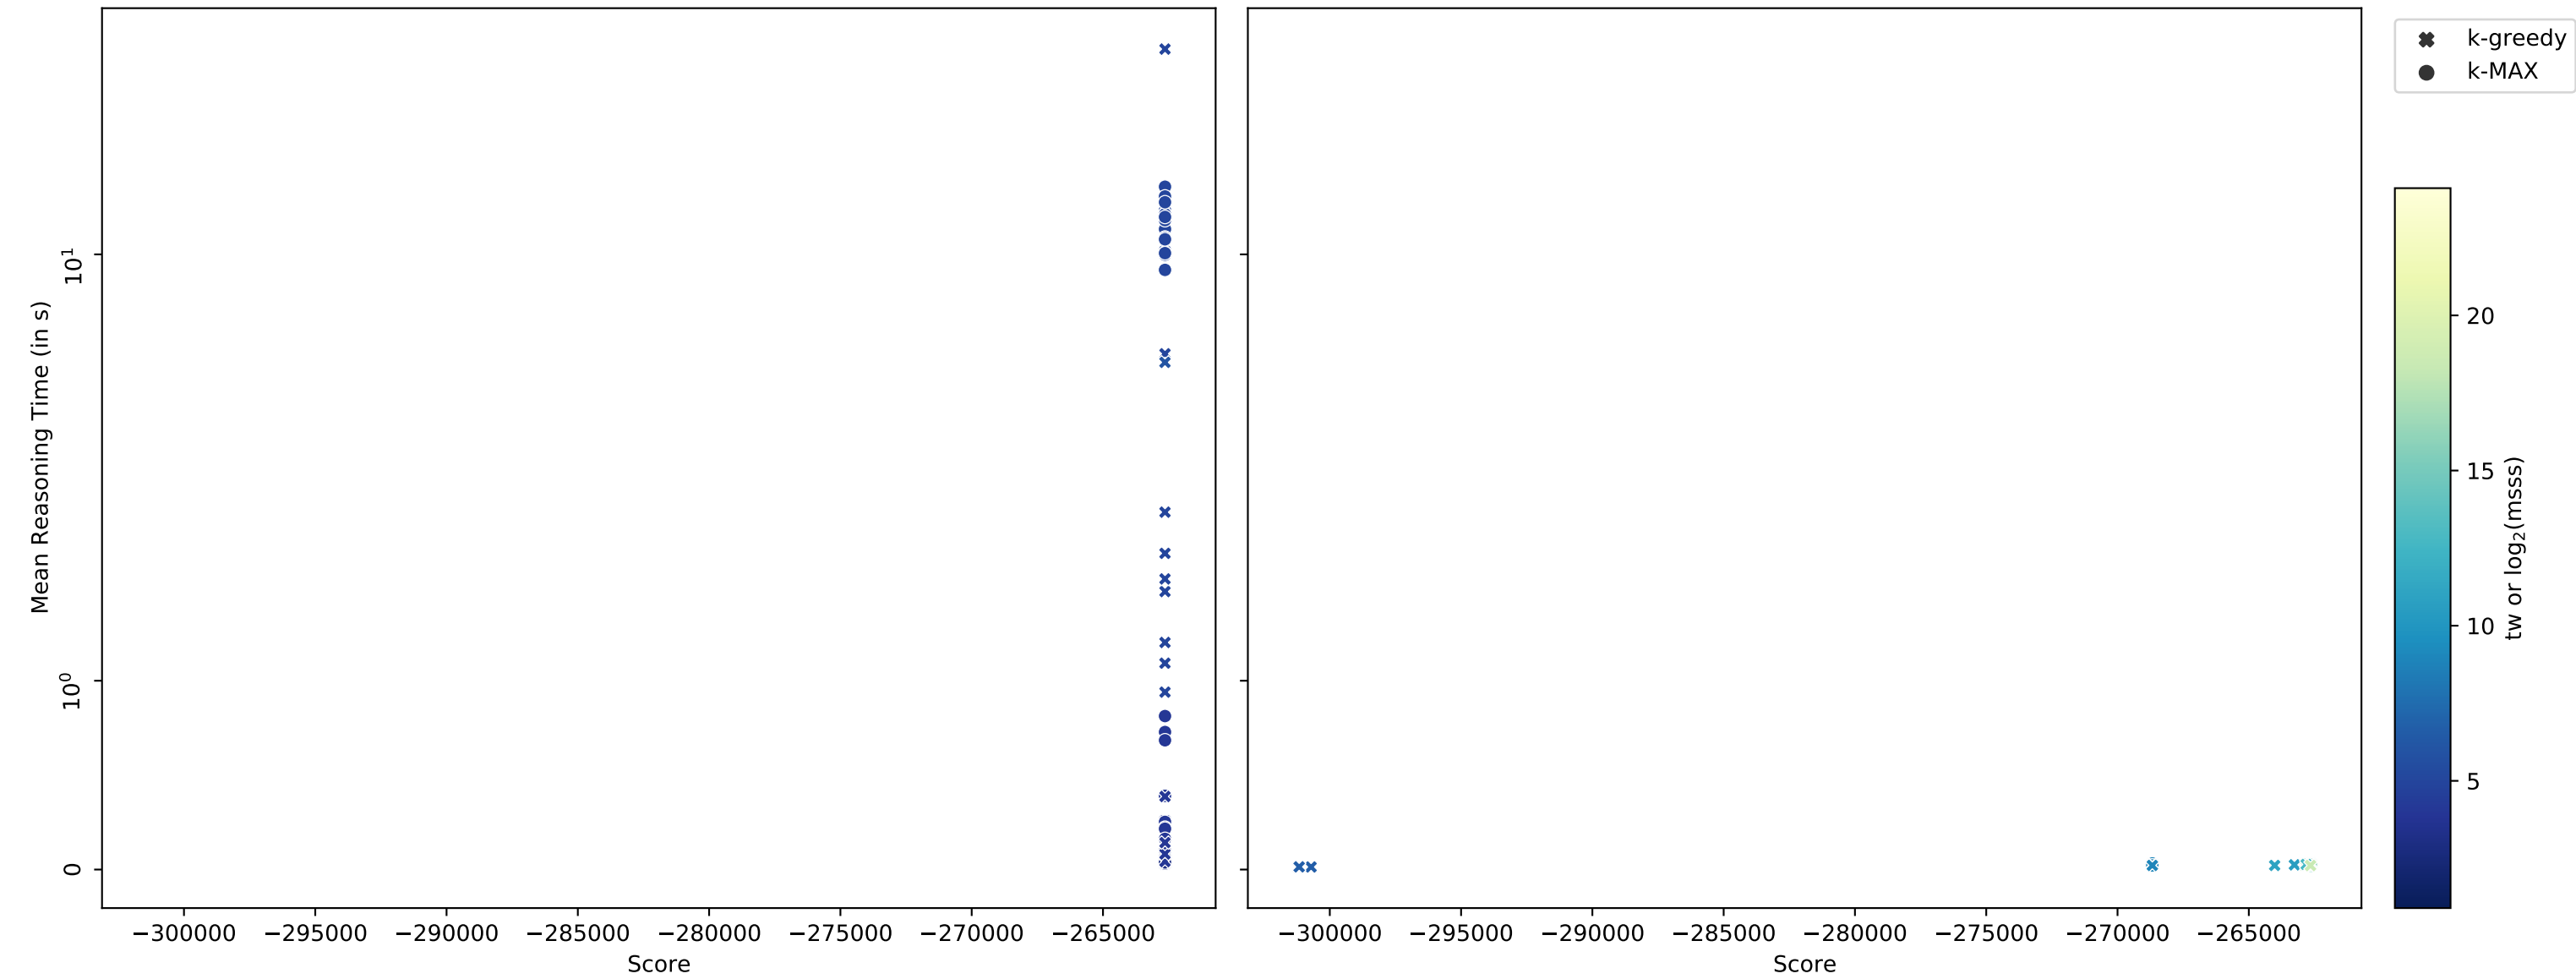

Supplement: supplementary_material [file attachment]
